# Supplementary material for: Characterizing metabolic stress-induced phenotypes of Synechocystis PCC6803 with Raman spectroscopy
Source: PeerJ. 2020 Mar 30;8:e8535. doi: 10.7717/peerj.8535 (PMC7115747; doi:10.7717/peerj.8535)
Supplement: Appendix S1 [file peerj-08-8535-s001.xlsx]

## Sheet: Cover
Supplementary Appendix 1
Characterizing metabolic stress-induced phenotypes of Synechocystis PCC6803 with Raman spectroscopy
Imen Tanniche1, Eva Collakova2, Cynthia Denbow2, Ryan S. Senger*1,3
1 Department of Biological Systems Engineering, Virginia Polytechnic Institute and State University (Virginia Tech), Blacksburg, Virginia, United States
2 School of Plant & Environmental Sciences, Virginia Polytechnic Institute and State University (Virginia Tech), Blacksburg, Virginia, United States
3 Department of Chemical Engineering, Virginia Polytechnic Institute and State University (Virginia Tech), Blacksburg, Virginia, United States
* Corresponding Author
1230 Washington St.
301C HABB1
Blacksburg, VA 24061
Email: senger@vt.edu
Phone: 540-231-9501

## Sheet: Field File
Index	Barcode	Project	Instrument	Scan Date	Scanned By	Collection Date	Replicate Scans	Storage Box	Position	Treatment	Concentration (mM)	Culture Replicate	Time	Culture
1	SYN1	Synechocystis	Alpha	20190130	Imen Tanniche	20190130	20	TBD	TBD	Acetate	15	R1	NA	Acetate1
2	SYN2	Synechocystis	Alpha	20190130	Imen Tanniche	20190130	20	TBD	TBD	Acetate	15	R2	NA	Acetate1
3	SYN3	Synechocystis	Alpha	20190130	Imen Tanniche	20190130	20	TBD	TBD	Acetate	15	R3	NA	Acetate1
4	SYN4	Synechocystis	Alpha	20190130	Imen Tanniche	20190130	20	TBD	TBD	Acetate	7.5	R1	NA	Acetate1
5	SYN5	Synechocystis	Alpha	20190130	Imen Tanniche	20190130	20	TBD	TBD	Acetate	7.5	R2	NA	Acetate1
6	SYN6	Synechocystis	Alpha	20190130	Imen Tanniche	20190130	20	TBD	TBD	Acetate	7.5	R3	NA	Acetate1
7	SYN7	Synechocystis	Alpha	20190130	Imen Tanniche	20190130	20	TBD	TBD	Acetate	15	R1	NA	Acetate2
8	SYN8	Synechocystis	Alpha	20190130	Imen Tanniche	20190130	20	TBD	TBD	Acetate	15	R2	NA	Acetate2
9	SYN9	Synechocystis	Alpha	20190130	Imen Tanniche	20190130	20	TBD	TBD	Acetate	15	R3	NA	Acetate2
10	SYN10	Synechocystis	Alpha	20190130	Imen Tanniche	20190130	20	TBD	TBD	Acetate	7.5	R1	NA	Acetate2
11	SYN11	Synechocystis	Alpha	20190130	Imen Tanniche	20190130	20	TBD	TBD	Acetate	7.5	R2	NA	Acetate2
12	SYN12	Synechocystis	Alpha	20190130	Imen Tanniche	20190130	20	TBD	TBD	Acetate	7.5	R3	NA	Acetate2
13	SYN13	Synechocystis	Alpha	20190130	Imen Tanniche	20190130	20	TBD	TBD	Acetate	15	R1	NA	Acetate3
14	SYN14	Synechocystis	Alpha	20190130	Imen Tanniche	20190130	20	TBD	TBD	Acetate	15	R2	NA	Acetate3
15	SYN15	Synechocystis	Alpha	20190130	Imen Tanniche	20190130	20	TBD	TBD	Acetate	15	R3	NA	Acetate3
16	SYN16	Synechocystis	Alpha	20190130	Imen Tanniche	20190130	20	TBD	TBD	Acetate	7.5	R1	NA	Acetate3
17	SYN17	Synechocystis	Alpha	20190130	Imen Tanniche	20190130	20	TBD	TBD	Acetate	7.5	R2	NA	Acetate3
18	SYN18	Synechocystis	Alpha	20190130	Imen Tanniche	20190130	20	TBD	TBD	Acetate	7.5	R3	NA	Acetate3
19	SYN19	Synechocystis	Alpha	20190130	Imen Tanniche	20190130	20	TBD	TBD	BG-11	0	R1	NA	BG-111
20	SYN20	Synechocystis	Alpha	20190130	Imen Tanniche	20190130	20	TBD	TBD	BG-11	0	R2	NA	BG-111
21	SYN21	Synechocystis	Alpha	20190130	Imen Tanniche	20190130	20	TBD	TBD	BG-11	0	R3	NA	BG-111
22	SYN22	Synechocystis	Alpha	20190130	Imen Tanniche	20190130	20	TBD	TBD	BG-11	0	R1	NA	BG-112
23	SYN23	Synechocystis	Alpha	20190130	Imen Tanniche	20190130	20	TBD	TBD	BG-11	0	R2	NA	BG-112
24	SYN24	Synechocystis	Alpha	20190130	Imen Tanniche	20190130	20	TBD	TBD	BG-11	0	R3	NA	BG-112
25	SYN25	Synechocystis	Alpha	20190130	Imen Tanniche	20190130	20	TBD	TBD	BG-11	0	R1	NA	BG-113
26	SYN26	Synechocystis	Alpha	20190130	Imen Tanniche	20190130	20	TBD	TBD	BG-11	0	R2	NA	BG-113
27	SYN27	Synechocystis	Alpha	20190130	Imen Tanniche	20190130	20	TBD	TBD	BG-11	0	R3	NA	BG-113
29	SYN29	Synechocystis	Alpha	20190201	Imen Tanniche	20190201	20	TBD	TBD	Sodium chloride	100	R1	NA	Sodium chloride1
30	SYN30	Synechocystis	Alpha	20190201	Imen Tanniche	20190201	20	TBD	TBD	Sodium chloride	100	R2	NA	Sodium chloride1
31	SYN31	Synechocystis	Alpha	20190201	Imen Tanniche	20190201	20	TBD	TBD	Sodium chloride	100	R3	NA	Sodium chloride1
32	SYN32	Synechocystis	Alpha	20190201	Imen Tanniche	20190201	20	TBD	TBD	Sodium chloride	150	R1	NA	Sodium chloride1
33	SYN33	Synechocystis	Alpha	20190201	Imen Tanniche	20190201	20	TBD	TBD	Sodium chloride	150	R2	NA	Sodium chloride1
34	SYN34	Synechocystis	Alpha	20190201	Imen Tanniche	20190201	20	TBD	TBD	Sodium chloride	150	R3	NA	Sodium chloride1
35	SYN35	Synechocystis	Alpha	20190130	Imen Tanniche	20190130	20	TBD	TBD	Sodium chloride	50	R1	NA	Sodium chloride1
36	SYN36	Synechocystis	Alpha	20190130	Imen Tanniche	20190130	20	TBD	TBD	Sodium chloride	50	R2	NA	Sodium chloride1
37	SYN37	Synechocystis	Alpha	20190130	Imen Tanniche	20190130	20	TBD	TBD	Sodium chloride	50	R3	NA	Sodium chloride1
38	SYN38	Synechocystis	Alpha	20190130	Imen Tanniche	20190130	20	TBD	TBD	Sodium chloride	100	R1	NA	Sodium chloride2
39	SYN39	Synechocystis	Alpha	20190130	Imen Tanniche	20190130	20	TBD	TBD	Sodium chloride	100	R2	NA	Sodium chloride2
40	SYN40	Synechocystis	Alpha	20190130	Imen Tanniche	20190130	20	TBD	TBD	Sodium chloride	100	R3	NA	Sodium chloride2
41	SYN41	Synechocystis	Alpha	20190201	Imen Tanniche	20190201	20	TBD	TBD	Sodium chloride	50	R1	NA	Sodium chloride2
42	SYN42	Synechocystis	Alpha	20190201	Imen Tanniche	20190201	20	TBD	TBD	Sodium chloride	50	R2	NA	Sodium chloride2
43	SYN43	Synechocystis	Alpha	20190201	Imen Tanniche	20190201	20	TBD	TBD	Sodium chloride	50	R3	NA	Sodium chloride2
44	SYN44	Synechocystis	Alpha	20190130	Imen Tanniche	20190130	20	TBD	TBD	Sodium chloride	100	R1	NA	Sodium chloride3
45	SYN45	Synechocystis	Alpha	20190130	Imen Tanniche	20190130	20	TBD	TBD	Sodium chloride	100	R2	NA	Sodium chloride3
46	SYN46	Synechocystis	Alpha	20190130	Imen Tanniche	20190130	20	TBD	TBD	Sodium chloride	100	R3	NA	Sodium chloride3
47	SYN47	Synechocystis	Alpha	20190201	Imen Tanniche	20190201	20	TBD	TBD	Sodium chloride	150	R1	NA	Sodium chloride3
48	SYN48	Synechocystis	Alpha	20190201	Imen Tanniche	20190201	20	TBD	TBD	Sodium chloride	150	R2	NA	Sodium chloride3
49	SYN49	Synechocystis	Alpha	20190201	Imen Tanniche	20190201	20	TBD	TBD	Sodium chloride	150	R3	NA	Sodium chloride3
50	SYN50	Synechocystis	Alpha	20190201	Imen Tanniche	20190201	20	TBD	TBD	Sodium chloride	50	R1	NA	Sodium chloride3
51	SYN51	Synechocystis	Alpha	20190201	Imen Tanniche	20190201	20	TBD	TBD	Sodium chloride	50	R2	NA	Sodium chloride3
52	SYN52	Synechocystis	Alpha	20190201	Imen Tanniche	20190201	20	TBD	TBD	Sodium chloride	50	R3	NA	Sodium chloride3
53	SYN53	Synechocystis	Alpha	20190214	Imen Tanniche	20190214	20	TBD	TBD	Acetate	30	R1	NA	Acetate1
54	SYN54	Synechocystis	Alpha	20190214	Imen Tanniche	20190214	20	TBD	TBD	Acetate	30	R2	NA	Acetate1
55	SYN55	Synechocystis	Alpha	20190214	Imen Tanniche	20190214	20	TBD	TBD	Acetate	30	R3	NA	Acetate1
56	SYN56	Synechocystis	Alpha	20190214	Imen Tanniche	20190214	20	TBD	TBD	Acetate	30	R1	NA	Acetate2
57	SYN57	Synechocystis	Alpha	20190214	Imen Tanniche	20190214	20	TBD	TBD	Acetate	30	R2	NA	Acetate2
58	SYN58	Synechocystis	Alpha	20190214	Imen Tanniche	20190214	20	TBD	TBD	Acetate	30	R3	NA	Acetate2
59	SYN59	Synechocystis	Alpha	20190214	Imen Tanniche	20190214	20	TBD	TBD	Acetate	30	R1	NA	Acetate3
60	SYN60	Synechocystis	Alpha	20190214	Imen Tanniche	20190214	20	TBD	TBD	Acetate	30	R2	NA	Acetate3
61	SYN61	Synechocystis	Alpha	20190214	Imen Tanniche	20190214	20	TBD	TBD	Acetate	30	R3	NA	Acetate3
62	SYN62	Synechocystis	Alpha	20190301	Imen Tanniche	20190214	20	TBD	TBD	Magnesium sulfate	0 mM	R1	NA	Magnesium sulfate-1
63	SYN63	Synechocystis	Alpha	20190301	Imen Tanniche	20190214	20	TBD	TBD	Magnesium sulfate	0 mM	R2	NA	Magnesium sulfate-1
64	SYN64	Synechocystis	Alpha	20190301	Imen Tanniche	20190214	20	TBD	TBD	Magnesium sulfate	0 mM	R3	NA	Magnesium sulfate-1
65	SYN65	Synechocystis	Alpha	20190301	Imen Tanniche	20190214	20	TBD	TBD	Magnesium sulfate	0 mM	R1	NA	Magnesium sulfate-2
66	SYN66	Synechocystis	Alpha	20190301	Imen Tanniche	20190214	20	TBD	TBD	Magnesium sulfate	0 mM	R2	NA	Magnesium sulfate-2
67	SYN67	Synechocystis	Alpha	20190301	Imen Tanniche	20190214	20	TBD	TBD	Magnesium sulfate	0 mM	R3	NA	Magnesium sulfate-2
68	SYN68	Synechocystis	Alpha	20190301	Imen Tanniche	20190214	20	TBD	TBD	Magnesium sulfate	0 mM	R1	NA	Magnesium sulfate-3
69	SYN69	Synechocystis	Alpha	20190301	Imen Tanniche	20190214	20	TBD	TBD	Magnesium sulfate	0 mM	R2	NA	Magnesium sulfate-3
70	SYN70	Synechocystis	Alpha	20190301	Imen Tanniche	20190214	20	TBD	TBD	Magnesium sulfate	0 mM	R3	NA	Magnesium sulfate-3
71	SYN71	Synechocystis	Alpha	20190301	Imen Tanniche	20190214	20	TBD	TBD	Magnesium sulfate	15.625 mM	R1	NA	Magnesium sulfate-1
72	SYN72	Synechocystis	Alpha	20190301	Imen Tanniche	20190214	20	TBD	TBD	Magnesium sulfate	15.625 mM	R2	NA	Magnesium sulfate-1
73	SYN73	Synechocystis	Alpha	20190301	Imen Tanniche	20190214	20	TBD	TBD	Magnesium sulfate	15.625 mM	R3	NA	Magnesium sulfate-1
74	SYN74	Synechocystis	Alpha	20190301	Imen Tanniche	20190214	20	TBD	TBD	Magnesium sulfate	15.625 mM	R1	NA	Magnesium sulfate-2
75	SYN75	Synechocystis	Alpha	20190301	Imen Tanniche	20190214	20	TBD	TBD	Magnesium sulfate	15.625 mM	R2	NA	Magnesium sulfate-2
76	SYN76	Synechocystis	Alpha	20190301	Imen Tanniche	20190214	20	TBD	TBD	Magnesium sulfate	15.625 mM	R3	NA	Magnesium sulfate-2
77	SYN77	Synechocystis	Alpha	20190301	Imen Tanniche	20190214	20	TBD	TBD	Magnesium sulfate	15.625 mM	R1	NA	Magnesium sulfate-3
78	SYN78	Synechocystis	Alpha	20190301	Imen Tanniche	20190214	20	TBD	TBD	Magnesium sulfate	15.625 mM	R2	NA	Magnesium sulfate-3
79	SYN79	Synechocystis	Alpha	20190301	Imen Tanniche	20190214	20	TBD	TBD	Magnesium sulfate	15.625 mM	R3	NA	Magnesium sulfate-3
80	SYN80	Synechocystis	Alpha	20190301	Imen Tanniche	20190214	20	TBD	TBD	Magnesium sulfate	31.25 mM	R1	NA	Magnesium sulfate-1
81	SYN81	Synechocystis	Alpha	20190301	Imen Tanniche	20190214	20	TBD	TBD	Magnesium sulfate	31.25 mM	R2	NA	Magnesium sulfate-1
82	SYN82	Synechocystis	Alpha	20190301	Imen Tanniche	20190214	20	TBD	TBD	Magnesium sulfate	31.25 mM	R3	NA	Magnesium sulfate-1
83	SYN83	Synechocystis	Alpha	20190301	Imen Tanniche	20190214	20	TBD	TBD	Magnesium sulfate	31.25 mM	R1	NA	Magnesium sulfate-2
84	SYN84	Synechocystis	Alpha	20190301	Imen Tanniche	20190214	20	TBD	TBD	Magnesium sulfate	31.25 mM	R2	NA	Magnesium sulfate-2
85	SYN85	Synechocystis	Alpha	20190301	Imen Tanniche	20190214	20	TBD	TBD	Magnesium sulfate	31.25 mM	R3	NA	Magnesium sulfate-2
86	SYN86	Synechocystis	Alpha	20190301	Imen Tanniche	20190214	20	TBD	TBD	Magnesium sulfate	31.25 mM	R1	NA	Magnesium sulfate-3
87	SYN87	Synechocystis	Alpha	20190301	Imen Tanniche	20190214	20	TBD	TBD	Magnesium sulfate	31.25 mM	R2	NA	Magnesium sulfate-3
88	SYN88	Synechocystis	Alpha	20190301	Imen Tanniche	20190214	20	TBD	TBD	Magnesium sulfate	31.25 mM	R3	NA	Magnesium sulfate-3
89	SYN89	Synechocystis	Alpha	20190201	Imen Tanniche	20190208	20	TBD	TBD	Sodium chloride	150	R1	NA	Sodium chloride2
90	SYN90	Synechocystis	Alpha	20190201	Imen Tanniche	20190208	20	TBD	TBD	Sodium chloride	150	R2	NA	Sodium chloride2
91	SYN91	Synechocystis	Alpha	20190201	Imen Tanniche	20190208	20	TBD	TBD	Sodium chloride	150	R3	NA	Sodium chloride2

## Sheet: PCA Contributions
Acetate Study	Figure 1C
Major Band	Designation	Reference
573	Tryptophan/cytosine, guanine	1
630	Glycerol	2
1088	C-C stretch	1
1156	Protein assignment; Carotenoids	3, 4, 5
1518	Carotenoids	6
Sodium chloride Study	Figure 2C
Major Band	Designation	Reference
428	phosphate of HA	7
515	Serine	8
573	Tryptophan/cytosine, guanine	1
630	Glycerol	2
669	Cytosine	1
684	Phenylalanine	9
725	DNA/RNA	10
750	Lactic acid	11
780	Uracil	12
1157	Carotenoids, beta-carotene	3, 4, 5
1188	Phenylalanine	9
1260	Amide III,Second amide, lipids, Proteins	1, 3, 5, 13, 14, 15
1520	Carotenoid, carotene	2019-01-16
Magnesium sulfate Study	Figure 3C
Major Band	Designation	Reference
429	Cholesterol, cholesterol ester	2
573	Tryptophan/cytosine, guanine	1
630	Glycerol	2
684	Phenylalanine	9
750	Lactic acid	11
1157	Carotenoids, beta-carotene	3, 4, 5
1188	Phenylalanine	9
1330	Phospholipids	16
1380	Lipid assignment	17
1520	Carotenoid, carotene	2019-01-16
All Phenotypes Study	Figure 4C
Major Band	Designation	Reference
428	Phosphate of HA	7
575	Phosphatidylinositol	2
625	Lysine	9
685	Tryptophan	9
725	DNA/RNA	10
750	Lactic acid	11
780	Uracil	12
1087	acyl backbone in lipids	7
1157	Carotenoids, beta-carotene	3, 4, 5
1188	Phenylalanine	9
1328	Nucleic acids	18
1360	Tryptophan	19
1520	Carotenoid, carotene	2019-01-16

## Sheet: DAPC Contributions
Acetate Study
Major Band	Designation	Reference
415	Phosphatidylinositol	2
436	Unknown
477	Polysaccharides, amylose, amylopectin	19
502	Riboﬂavin	8
512	Unknown
524	Proteins, Phosphatidylserine	2020-01-02
532	Alanine	8
543	Unknown
618	Protein	10
638	Methionine	19
689	Unknown
698	Arabinose, N-Acetyl-D-glucosamine	8
704	Galactosamine	8
715	Tyrosine, Valine	9
746	DNA/RNA	10
920	Proline ring, glucose, lactic acid	2019-01-20			Figure S1. Raman shift contributions to DAPC clustering in Figure 1B, separation by the presence of acetate in BG-11 medium.
988	Glutamic acid, lysine, tryptophan	9
1005	Phenylalanine, proteins	21
1155	Protein assignment; Carotenoids	2019-01-20
1086	acyl backbone in lipids	7
1196	Cystine	9
1327	Glycine, serine	9
1495	Histidine	9
1510	DNA	10
1528	Carotenoids	3
1550	Tryptophan	6
1558	Tryptophan	7
1615	Tyrosine, tryptophan	10
1790	Unknown
Sodium Chloride Study
Major Band	Designation	Reference
405	Unkown
422	Unkown
430	Cholesterol, cholesterol ester	2
594	Phosphatidylinositol
650	Guanine	8
712	Unkown
730	Proline	21
746	DNA/RNA	10
798	Unkown
854	Polysaccharides, pectin, tyrosine	19, 21
1040	Carbohydrates, Proline	13, 22
1090	Phosphate, DNA	13, 23
1157	Carotenoids, beta-carotene	3, 4, 5
1200	Nucleic acids and phosphates	24
1255	Lipids	25			Figure S2. Raman shift contributions to DAPC clustering in Figure 2B, separation by the presence of sodium chloride in BG-11 medium.
1329	DNA, Phospholipid collagen, Nucleic acids and phosphates	16, 24, 26
1495	Histidine	9
1517	Beta-carotene	5
Magnesium sulfate Study
Major Band	Designation	Reference
412	Phosphatidylinositol	2
424	Unknown
850	Amino acids, valine, polysaccharides, tyrosine	19, 27
862	Unknown
868	Monosaccharides	19
992	Aspartate, proline	9
1157	Carotenoids, beta-carotene	3, 4, 5
1456	Deoxyribose	28
1496	Riboﬂavin	8
1520	Carotenoid, carotene	2019-01-16
1577	Guanine, Bound & free NADH	16, 28
1585	C=C oleﬁnic stretch	29
					Figure S3. Raman shift contributions to DAPC clustering in Figure 3B, separation by the presence of magnesium sulfate in BG-11 medium.
All Phenotypes Study
Major Band	Designation	Reference
412	Phosphatidylinositol	2
424	Unknown
442	Unknown
509	Collagen, Cysteine	2019-07-19
615	Cholesterol ester	2
652	Alanine, Arginine	2019-08-09
746	DNA/RNA	10
850	Amino acids, valine, polysaccharides, tyrosine	19, 27
861	Phosphate group, Phosphatidic acid	2
992	Aspartate, proline	9
1058	Lipids	13
1086	acyl backbone in lipids	7
1155	Proteins, carotenoid	2019-01-20
1226	Lysine	9
1245	Amide III	19
1251	Guanine, cytosine	28
1327	Nucleic acids	18
1456	Deoxyribose	28
1462	Disaccharides, sucrose	19
1513	Cytosine	28
1577	Guanine, Bound & free NADH	16, 28			Figure S4. Raman shift contributions to DAPC clustering in Figure 4B, separation by differences in all treatments.
1618	Tryptophan, Bound and free NADH	2019-06-16
1661	Amide I, Lipids	21, 25
1720	C=O	2

## Sheet: Raw Distances
Acetate Study					Sodium Chloride Study						Magnesium sulfate Study						All Phenotypes Study
Reference = 0					Reference = 0						Reference = 62.5						Reference = 0
Factor	TSD	TPD	TCD (12 PCs)		Factor	TSD	TPD	TCD (12 PCs)			Factor	TSD	TPD	TCD (12 PCs)			Factor	TSD	TPD	TCD (15 PCs)
15'	0.113903	0.0932186	65.7068		0'	0	0	0			62.5'	0	0	0			Acetate'	0.113903	0.044251	37.58
15'	0.0563994	0.0370834	74.8933		0'	0.0588047	0.0283521	8.1424			62.5'	0.0588047	0.0269795	15.1197			Acetate'	0.0563994	0.0171181	35.1297
15'	0.211807	0.184117	58.4357		0'	0.103111	0.0972129	7.67582			62.5'	0.103111	0.0946742	20.1597			Acetate'	0.211807	0.139158	33.4395
15'	0.0294348	0.0154262	45.0302		0'	0.0769803	0.0339328	21.3321			62.5'	0.0769803	0.0234319	27.0276			Acetate'	0.0294348	0.00799755	24.6916
15'	0.0248084	0.0126846	37.6545		0'	0.0845598	0.0373413	22.5006			62.5'	0.0845598	0.0249726	30.5877			Acetate'	0.0248084	0.00766785	21.3346
15'	0.0650679	0.0443953	37.6548		0'	0.12136	0.0846959	19.4674			62.5'	0.12136	0.0727028	33.3772			Acetate'	0.0650679	0.036535	33.3699
15'	0.0481908	0.0310156	45.1682		0'	0.0852897	0.0514863	23.3812			62.5'	0.0852897	0.0506988	17.9646			Acetate'	0.0481908	0.0127224	25.6528
15'	0.14566	0.102794	54.4466		0'	0.132079	0.114821	17.4032			62.5'	0.132079	0.115815	21.4368			Acetate'	0.14566	0.0713697	47.8344
15'	0.19785	0.177142	49.2185		0'	0.141206	0.133851	18.379			62.5'	0.141206	0.106216	26.8051			Acetate'	0.19785	0.144529	32.1298
15'	0.166907	0.137982	75.0668		0'	0.0588047	0.0283521	8.1424			62.5'	0.0588047	0.0269795	15.1197			Acetate'	0.166907	0.0990043	31.7384
15'	0.0626099	0.0378452	93.5948		0'	0	0	0			62.5'	0	0	0			Acetate'	0.0626099	0.0202709	34.3063
15'	0.391549	0.345243	72.0456		0'	0.226822	0.178751	19.8195			62.5'	0.226822	0.211717	43.8757			Acetate'	0.391549	0.301238	35.9528
15'	0.0569596	0.0268893	59.6472		0'	0.0110015	0.00236394	12.2655			62.5'	0.0110015	0.0030281	18.4827			Acetate'	0.0569596	0.0206408	29.8027
15'	0.0558125	0.0247201	59.5257		0'	0.017471	0.00443456	16.0597			62.5'	0.017471	0.00514341	26.0015			Acetate'	0.0558125	0.0184616	30.0725
15'	0.017746	0.00720677	34.5774		0'	0.028186	0.0161308	19.8757			62.5'	0.028186	0.0119898	36.6313			Acetate'	0.017746	0.00120941	19.5886
15'	0.0479352	0.0211232	61.3848		0'	0.0147147	0.00352084	21.572			62.5'	0.0147147	0.00777379	13.048			Acetate'	0.0479352	0.0109463	24.9457
15'	0.0583179	0.0336708	52.2865		0'	0.0644099	0.0441489	25.3794			62.5'	0.0644099	0.0366874	35.4369			Acetate'	0.0583179	0.0131649	26.796
15'	0.39687	0.35411	68.5458		0'	0.234438	0.206165	26.1747			62.5'	0.234438	0.225807	39.2406			Acetate'	0.39687	0.314919	37.5823
15'	0.163205	0.132507	77.7705		0'	0.103111	0.0972129	7.67582			62.5'	0.103111	0.0946742	20.1597			Acetate'	0.163205	0.0960057	33.8165
15'	0.0609104	0.0347245	97.1078		0'	0.226822	0.178751	19.8195			62.5'	0.226822	0.211717	43.8757			Acetate'	0.0609104	0.0193633	36.7224
15'	0.387098	0.338534	74.6134		0'	0	0	0			62.5'	0	0	0			Acetate'	0.387098	0.295452	38.0969
15'	0.0563306	0.0246854	63.5012		0'	0.219419	0.163626	22.977			62.5'	0.219419	0.189608	25.703			Acetate'	0.0563306	0.0191751	32.8386
15'	0.0551125	0.022858	62.5209		0'	0.228149	0.169237	17.4049			62.5'	0.228149	0.195005	24.685			Acetate'	0.0551125	0.017094	32.5103
15'	0.0176524	0.00580322	37.9776		0'	0.346158	0.292678	21.2664			62.5'	0.346158	0.317002	29.7214			Acetate'	0.0176524	0.0013089	22.3568
15'	0.0450411	0.0186502	63.6448		0'	0.264397	0.21825	17.1981			62.5'	0.264397	0.249162	24.9303			Acetate'	0.0450411	0.00917298	26.5229
15'	0.0566055	0.0315451	54.3846		0'	0.420687	0.38926	20.5677			62.5'	0.420687	0.405868	33.4823			Acetate'	0.0566055	0.0132225	28.721
15'	0.393075	0.348091	70.6782		0'	0.0143162	0.00667575	5.53053			62.5'	0.0143162	0.000760964	6.1767			Acetate'	0.393075	0.309331	40.05
7.5'	0.0818259	0.0637158	61.044		0'	0.0769803	0.0339328	21.3321			62.5'	0.0769803	0.0234319	27.0276			Acetate'	0.0818259	0.0360391	28.8169
7.5'	0.0769929	0.0445474	84.4717		0'	0.0110015	0.00236394	12.2655			62.5'	0.0110015	0.0030281	18.4827			Acetate'	0.0769929	0.0384263	42.1665
7.5'	0.128163	0.102154	58.1389		0'	0.219419	0.163626	22.977			62.5'	0.219419	0.189608	25.703			Acetate'	0.128163	0.0762027	23.8698
7.5'	0.0522868	0.0263667	47.2081		0'	0	0	0			62.5'	0	0	0			Acetate'	0.0522868	0.0264729	26.4324
7.5'	0.0529869	0.0281223	40.1199		0'	0.00670434	0.00139214	7.47725			62.5'	0.00670434	0.00134732	1.94722			Acetate'	0.0529869	0.0298879	22.5771
7.5'	0.105802	0.0785543	37.6535		0'	0.0335382	0.0202857	17.8203			62.5'	0.0335382	0.0166238	17.4236			Acetate'	0.105802	0.0799828	29.0191
7.5'	0.0760206	0.0472127	49.3912		0'	0.0173737	0.0041877	21.216			62.5'	0.0173737	0.00536704	6.41367			Acetate'	0.0760206	0.0414373	28.2166
7.5'	0.18616	0.143873	48.2376		0'	0.0913767	0.0584228	32.2802			62.5'	0.0913767	0.0453603	29.771			Acetate'	0.18616	0.132011	36.493
7.5'	0.121295	0.0973035	47.8184		0'	0.216226	0.18328	26.4239			62.5'	0.216226	0.201042	20.2925			Acetate'	0.121295	0.0792028	22.0222
7.5'	0.120608	0.0938637	82.5502		0'	0.0845598	0.0373413	22.5006			62.5'	0.0845598	0.0249726	30.5877			Acetate'	0.120608	0.0545103	30.299
7.5'	0.052129	0.0234849	100.322		0'	0.017471	0.00443456	16.0597			62.5'	0.017471	0.00514341	26.0015			Acetate'	0.052129	0.0130355	33.3415
7.5'	0.303152	0.273009	74.7458		0'	0.228149	0.169237	17.4049			62.5'	0.228149	0.195005	24.685			Acetate'	0.303152	0.229054	25.6098
7.5'	0.0341217	0.0155382	55.7131		0'	0.00670434	0.00139214	7.47725			62.5'	0.00670434	0.00134732	1.94722			Acetate'	0.0341217	0.0131759	17.4614
7.5'	0.0265148	0.00918321	54.265		0'	0	0	0			62.5'	0	0	0			Acetate'	0.0265148	0.00820115	15.2652
7.5'	0.045778	0.0189172	41.2451		0'	0.0347555	0.0221473	14.5846			62.5'	0.0347555	0.0172028	17.9439			Acetate'	0.045778	0.0177483	24.0458
7.5'	0.043194	0.0208113	65.7741		0'	0.0164772	0.00601394	10.7519			62.5'	0.0164772	0.00649317	8.89464			Acetate'	0.043194	0.00883994	22.2581
7.5'	0.085667	0.0374087	64.8657		0'	0.0892131	0.0558317	26.8826			62.5'	0.0892131	0.0402808	30.4519			Acetate'	0.085667	0.0176183	37.7149
7.5'	0.307392	0.282363	69.075		0'	0.220686	0.18714	12.1603			62.5'	0.220686	0.206819	17.2082			Acetate'	0.307392	0.249474	23.1533
7.5'	0.148271	0.0968033	81.6428		0'	0.12136	0.0846959	19.4674			62.5'	0.12136	0.0727028	33.3772			Acetate'	0.148271	0.021818	54.9885
7.5'	0.101417	0.0516014	85.26		0'	0.028186	0.0161308	19.8757			62.5'	0.028186	0.0119898	36.6313			Acetate'	0.101417	0.023553	46.9237
7.5'	0.258816	0.214476	66.7413		0'	0.346158	0.292678	21.2664			62.5'	0.346158	0.317002	29.7214			Acetate'	0.258816	0.142074	43.3655
7.5'	0.0652444	0.0343929	43.4255		0'	0.0335382	0.0202857	17.8203			62.5'	0.0335382	0.0166238	17.4236			Acetate'	0.0652444	0.0215131	24.837
7.5'	0.0591644	0.0288565	43.6163		0'	0.0347555	0.0221473	14.5846			62.5'	0.0347555	0.0172028	17.9439			Acetate'	0.0591644	0.0179881	24.6643
7.5'	0.126536	0.0641157	43.7517		0'	0	0	0			62.5'	0	0	0			Acetate'	0.126536	0.057738	48.2844
7.5'	0.100627	0.0553724	60.21		0'	0.0175521	0.006354	14.3791			62.5'	0.0175521	0.00676213	11.0741			Acetate'	0.100627	0.0271109	41.1807
7.5'	0.199994	0.101645	76.2668		0'	0.0322185	0.0179486	8.52625			62.5'	0.0322185	0.010651	8.48989			Acetate'	0.199994	0.0628554	75.191
7.5'	0.254525	0.218147	61.8137		0'	0.353409	0.31995	19.9311			62.5'	0.353409	0.332343	29.3445			Acetate'	0.254525	0.16534	38.4789
15'	0.15461	0.130811	74.1915		0'	0.0852897	0.0514863	23.3812			62.5'	0.0852897	0.0506988	17.9646			Acetate'	0.15461	0.0885933	38.2615
15'	0.055554	0.0351125	87.3049		0'	0.0147147	0.00352084	21.572			62.5'	0.0147147	0.00777379	13.048			Acetate'	0.055554	0.0197172	35.3697
15'	0.360975	0.324113	68.3768		0'	0.264397	0.21825	17.1981			62.5'	0.264397	0.249162	24.9303			Acetate'	0.360975	0.27789	40.081
15'	0.0453503	0.0224048	59.1016		0'	0.0173737	0.0041877	21.216			62.5'	0.0173737	0.00536704	6.41367			Acetate'	0.0453503	0.0171089	31.5761
15'	0.0422287	0.0201364	56.5736		0'	0.0164772	0.00601394	10.7519			62.5'	0.0164772	0.00649317	8.89464			Acetate'	0.0422287	0.0142355	31.5798
15'	0.0206608	0.00831457	39.841		0'	0.0175521	0.006354	14.3791			62.5'	0.0175521	0.00676213	11.0741			Acetate'	0.0206608	0.00537977	28.7883
15'	0.0369002	0.0193461	57.8731		0'	0	0	0			62.5'	0	0	0			Acetate'	0.0369002	0.00543046	27.5626
15'	0.064085	0.0392105	56.716		0'	0.0495592	0.0353709	11.1561			62.5'	0.0495592	0.0278993	14.9175			Acetate'	0.064085	0.0144518	39.4847
15'	0.364411	0.330792	65.4425		0'	0.266295	0.241782	11.0629			62.5'	0.266295	0.260493	20.0377			Acetate'	0.364411	0.292263	42.2008
15'	0.165231	0.140586	89.0783		0'	0.132079	0.114821	17.4032			62.5'	0.132079	0.115815	21.4368			Acetate'	0.165231	0.091185	43.9344
15'	0.062778	0.0411511	102.6		0'	0.0644099	0.0441489	25.3794			62.5'	0.0644099	0.0366874	35.4369			Acetate'	0.062778	0.0225712	40.6219
15'	0.365644	0.329672	80.9225		0'	0.420687	0.38926	20.5677			62.5'	0.420687	0.405868	33.4823			Acetate'	0.365644	0.277521	43.7806
15'	0.0483275	0.0256266	70.0084		0'	0.0913767	0.0584228	32.2802			62.5'	0.0913767	0.0453603	29.771			Acetate'	0.0483275	0.0188441	35.4919
15'	0.0438774	0.0220637	68.4629		0'	0.0892131	0.0558317	26.8826			62.5'	0.0892131	0.0402808	30.4519			Acetate'	0.0438774	0.0152336	34.6174
15'	0.0282197	0.012665	49.121		0'	0.0322185	0.0179486	8.52625			62.5'	0.0322185	0.010651	8.48989			Acetate'	0.0282197	0.00818345	34.1478
15'	0.042254	0.0243794	71.4512		0'	0.0495592	0.0353709	11.1561			62.5'	0.0495592	0.0278993	14.9175			Acetate'	0.042254	0.00624165	31.5759
15'	0.0762757	0.0471671	70.6426		0'	0	0	0			62.5'	0	0	0			Acetate'	0.0762757	0.0162013	46.1434
15'	0.366185	0.333007	78.8749		0'	0.45205	0.431519	21.8485			62.5'	0.45205	0.424441	36.1305			Acetate'	0.366185	0.29109	46.204
15'	0.166223	0.143232	84.0123		0'	0.141206	0.133851	18.379			62.5'	0.141206	0.106216	26.8051			Acetate'	0.166223	0.095734	39.7356
15'	0.0630548	0.0422862	96.4045		0'	0.234438	0.206165	26.1747			62.5'	0.234438	0.225807	39.2406			Acetate'	0.0630548	0.0251797	36.3714
15'	0.370387	0.336855	75.7729		0'	0.0143162	0.00667575	5.53053			62.5'	0.0143162	0.000760964	6.1767			Acetate'	0.370387	0.286924	39.2621
15'	0.0482685	0.0271542	63.8695		0'	0.216226	0.18328	26.4239			62.5'	0.216226	0.201042	20.2925			Acetate'	0.0482685	0.021578	30.5154
15'	0.043245	0.0234871	62.7448		0'	0.220686	0.18714	12.1603			62.5'	0.220686	0.206819	17.2082			Acetate'	0.043245	0.017527	30.3672
15'	0.0274445	0.0125163	44.5374		0'	0.353409	0.31995	19.9311			62.5'	0.353409	0.332343	29.3445			Acetate'	0.0274445	0.00903871	30.0368
15'	0.0412624	0.0252937	66.3506		0'	0.266295	0.241782	11.0629			62.5'	0.266295	0.260493	20.0377			Acetate'	0.0412624	0.00776592	28.0804
15'	0.0734167	0.045568	66.3757		0'	0.45205	0.431519	21.8485			62.5'	0.45205	0.424441	36.1305			Acetate'	0.0734167	0.0148107	42.6617
15'	0.371304	0.340814	73.8607		0'	0	0	0			62.5'	0	0	0			Acetate'	0.371304	0.300991	40.8774
7.5'	0.155445	0.133588	83.5178		100'	0.078931	0.0346892	90.6563			0'	0.730348	0.684551	752.877			Acetate'	0.155445	0.0817441	41.3406
7.5'	0.178713	0.142677	103.34		100'	0.0530802	0.00620876	100.29			0'	0.642092	0.622762	853.643			Acetate'	0.178713	0.119207	48.8719
7.5'	0.090078	0.0702538	67.849		100'	0.268935	0.22326	82.8223			0'	0.992706	0.959036	585.456			Acetate'	0.090078	0.0309472	28.2124
7.5'	0.133557	0.110589	60.5722		100'	0.0469249	0.0146236	52.1182			0'	0.640093	0.620191	650.523			Acetate'	0.133557	0.099713	30.4353
7.5'	0.13387	0.111069	56.4243		100'	0.046083	0.0141326	71.083			0'	0.592825	0.57226	606.093			Acetate'	0.13387	0.104862	26.9701
7.5'	0.242432	0.202477	50.788		100'	0.0450949	0.0171686	63.7237			0'	0.604526	0.593159	597.525			Acetate'	0.242432	0.189986	40.8546
7.5'	0.185887	0.15082	67.8062		100'	0.0481988	0.0107055	88.6472			0'	0.60717	0.591738	676.987			Acetate'	0.185887	0.128895	36.1019
7.5'	0.370038	0.302024	74.9886		100'	0.0659391	0.0240928	81.982			0'	0.514732	0.488746	638.526			Acetate'	0.370038	0.267197	56.6134
7.5'	0.0623914	0.0474528	59.0568		100'	0.298347	0.259731	94.5137			0'	1.00446	0.977435	591.704			Acetate'	0.0623914	0.0230705	26.5391
7.5'	0.424669	0.407513	70.7208		100'	0.208107	0.163446	104.55			0'	0.199648	0.159558	718.761			Acetate'	0.424669	0.314559	56.6485
7.5'	0.413143	0.38396	76.4327		100'	0.27528	0.22458	114.028			0'	0.284023	0.244221	818.929			Acetate'	0.413143	0.31069	71.2909
7.5'	0.274564	0.248802	55.6864		100'	0.0673934	0.0215549	89.8054			0'	0.124791	0.0846654	549.86			Acetate'	0.274564	0.186782	40.4409
7.5'	0.354994	0.31823	43.5764		100'	0.231315	0.196835	61.6677			0'	0.241778	0.200011	612.798			Acetate'	0.354994	0.269554	55.55
7.5'	0.353913	0.320634	47.0277		100'	0.231523	0.197863	72.2645			0'	0.241575	0.19628	574.596			Acetate'	0.353913	0.270969	51.8078
7.5'	0.444639	0.422196	35.3213		100'	0.373052	0.333905	76.1658			0'	0.351871	0.315503	564.546			Acetate'	0.444639	0.36129	52.3798
7.5'	0.392603	0.368816	54.9105		100'	0.305368	0.256642	108.641			0'	0.272954	0.233327	645.554			Acetate'	0.392603	0.292146	55.4955
7.5'	0.607872	0.594748	61.8424		100'	0.507324	0.451205	109.775			0'	0.430798	0.387261	616.14			Acetate'	0.607872	0.475893	63.6538
7.5'	0.220393	0.189686	52.5947		100'	0.0394787	0.00516159	91.7579			0'	0.134842	0.0759611	566.169			Acetate'	0.220393	0.140401	43.279
7.5'	0.101078	0.0764634	55.1757		100'	0.188964	0.139783	109.348			0'	0.741026	0.706084	700.952			Acetate'	0.101078	0.0422694	20.7571
7.5'	0.0332746	0.0143393	65.2842		100'	0.243505	0.190333	119.143			0'	0.674794	0.661053	789.315			Acetate'	0.0332746	0.00271591	21.2673
7.5'	0.267919	0.238716	50.4621		100'	0.0716048	0.0200825	94.5926			0'	1.01511	0.999028	528.095			Acetate'	0.267919	0.201893	18.7656
7.5'	0.0189097	0.00685164	28.3973		100'	0.200818	0.164653	66.3567			0'	0.655423	0.630459	589.959			Acetate'	0.0189097	0.00360177	8.54025
7.5'	0.0151568	0.00290166	31.2407		100'	0.201774	0.166529	74.8279			0'	0.603278	0.575497	551.002			Acetate'	0.0151568	0.00181142	7.83965
7.5'	0.0331151	0.0152772	18.2137		100'	0.330097	0.289672	77.863			0'	0.63594	0.610376	537.753			Acetate'	0.0331151	0.0115641	12.524
7.5'	0.0323387	0.0120918	41.1295		100'	0.270017	0.219047	112.53			0'	0.624741	0.611686	619.903			Acetate'	0.0323387	0.00530338	13.5998
7.5'	0.0853503	0.0389562	42.5599		100'	0.4611	0.402259	112.934			0'	0.543001	0.518882	589.287			Acetate'	0.0853503	0.0253035	26.2846
7.5'	0.26913	0.247961	45.992		100'	0.044429	0.00631054	94.6942			0'	1.02249	1.01374	534.722			Acetate'	0.26913	0.219367	15.3012
15'	0.0563423	0.034601	56.5191		150'	0.0918949	0.039314	94.5645			0'	0.5519	0.51958	758.164			Acetate'	0.0563423	0.0112293	23.2445
15'	0.0486823	0.0121504	77.8296		150'	0.0845785	0.0102499	111.956			0'	0.484576	0.477358	853.058			Acetate'	0.0486823	0.012871	27.2326
15'	0.191227	0.17098	49.3724		150'	0.283659	0.237433	79.726			0'	0.804174	0.787396	582.536			Acetate'	0.191227	0.143703	18.2156
15'	0.0367658	0.0128945	38.6541		150'	0.078482	0.0198116	63.7354			0'	0.45709	0.447265	646.19			Acetate'	0.0367658	0.0163492	11.6716
15'	0.0345059	0.0102944	40.8504		150'	0.0762031	0.0179975	74.4612			0'	0.413119	0.402025	602.192			Acetate'	0.0345059	0.0156524	11.9613
15'	0.0802618	0.0418541	28.237		150'	0.0700306	0.0198932	67.4741			0'	0.442744	0.43465	587.994			Acetate'	0.0802618	0.0486631	21.5832
15'	0.0617152	0.0244987	51.19		150'	0.074627	0.0147978	89.0511			0'	0.437705	0.430663	676.352			Acetate'	0.0617152	0.0273462	21.0075
15'	0.121891	0.0548758	49.1639		150'	0.0786189	0.0208869	82.2515			0'	0.389407	0.366454	643.635			Acetate'	0.121891	0.058018	36.5234
15'	0.208049	0.188793	47.7669		150'	0.32456	0.275444	90.7389			0'	0.81291	0.799679	592.337			Acetate'	0.208049	0.170449	17.3372
15'	0.471598	0.396245	101.686		150'	0.53653	0.506715	90.021			0'	0.453517	0.435325	787.801			Acetate'	0.471598	0.424449	44.4586
15'	0.360344	0.256126	121.447		150'	0.64863	0.631216	100.099			0'	0.394532	0.383506	882.203			Acetate'	0.360344	0.310939	56.0656
15'	0.760612	0.682035	97.7503		150'	0.308657	0.272011	69.6141			0'	0.657565	0.648129	609.816			Acetate'	0.760612	0.728409	37.4564
15'	0.350302	0.236035	87.5068		150'	0.623368	0.611745	58.0779			0'	0.363027	0.342702	673.085			Acetate'	0.350302	0.314724	39.4787
15'	0.310933	0.205666	80.0006		150'	0.615811	0.605352	63.689			0'	0.333748	0.309626	632.48			Acetate'	0.310933	0.27866	37.0327
15'	0.3142	0.210189	70.1348		150'	0.785938	0.77659	69.6626			0'	0.360419	0.342569	616.689			Acetate'	0.3142	0.266387	42.6158
15'	0.332711	0.249557	88.7344		150'	0.706051	0.694222	76.2507			0'	0.324184	0.314141	693.112			Acetate'	0.332711	0.284337	42.9981
15'	0.26068	0.200087	76.6679		150'	0.896907	0.876296	80.1032			0'	0.321432	0.305243	669.212			Acetate'	0.26068	0.180863	49.0491
15'	0.763564	0.679778	94.2979		150'	0.286001	0.262713	75.6832			0'	0.665983	0.649418	620.88			Acetate'	0.763564	0.746844	36.5842
15'	0.115059	0.0926456	61.2571		150'	0.621664	0.586806	113.437			0'	0.263984	0.235734	711.029			Acetate'	0.115059	0.0588855	20.6157
15'	0.0408566	0.0189069	78.1924		150'	0.733186	0.713516	124.108			0'	0.31602	0.298705	804.89			Acetate'	0.0408566	0.00897214	24.8099
15'	0.3184	0.287095	58.6671		150'	0.378301	0.336752	90.2447			0'	0.199346	0.178587	540.123			Acetate'	0.3184	0.246769	20.4591
15'	0.0312167	0.0140564	38.0067		150'	0.705137	0.692698	75.2926			0'	0.266628	0.246447	605.791			Acetate'	0.0312167	0.0112061	12.3666
15'	0.0277076	0.0106663	40.0308		150'	0.695548	0.684155	83.093			0'	0.261736	0.239473	565.554			Acetate'	0.0277076	0.00824815	11.7153
15'	0.0247158	0.00896444	22.7282		150'	0.871	0.861279	87.5341			0'	0.370963	0.351805	555.171			Acetate'	0.0247158	0.0081946	12.408
15'	0.0336892	0.013772	49.0806		150'	0.791182	0.778201	95.5387			0'	0.28069	0.264906	626.772			Acetate'	0.0336892	0.00667389	15.4619
15'	0.0600229	0.0241258	43.7653		150'	0.984746	0.961393	98.7417			0'	0.441429	0.41436	606.175			Acetate'	0.0600229	0.0116231	23.1942
15'	0.328545	0.301368	54.5959		150'	0.352477	0.324007	96.831			0'	0.192988	0.165926	548.525			Acetate'	0.328545	0.26787	18.651
7.5'	0.100197	0.0754652	36.6955		50'	0.112468	0.0354864	89.9526			0'	0.730201	0.668396	755.665			Acetate'	0.100197	0.0481334	17.7337
7.5'	0.0257054	0.0123069	39.742		50'	0.0507557	0.00411595	91.209			0'	0.690639	0.669539	842.516			Acetate'	0.0257054	0.00345998	15.0481
7.5'	0.270631	0.238723	34.6177		50'	0.259015	0.175415	74.7337			0'	0.706804	0.66737	576.211			Acetate'	0.270631	0.208537	18.1562
7.5'	0.0148102	0.00529833	14.4201		50'	0.0270615	0.00318549	43.1229			0'	0.659361	0.644198	637.952			Acetate'	0.0148102	0.00346709	6.78626
7.5'	0.010667	0.00250081	13.918		50'	0.0226613	0.000978722	45.8395			0'	0.645623	0.630097	596.85			Acetate'	0.010667	0.00176432	4.7611
7.5'	0.0247848	0.01181	10.2176		50'	0.0510704	0.020978	53.5062			0'	0.722687	0.70904	582.563			Acetate'	0.0247848	0.00895599	10.9867
7.5'	0.0221433	0.00877976	20.285		50'	0.0476022	0.0068967	68.7315			0'	0.646843	0.626684	668.03			Acetate'	0.0221433	0.0038818	8.1166
7.5'	0.0745022	0.0364439	26.891		50'	0.112759	0.0481785	78.7045			0'	0.759817	0.711424	643.436			Acetate'	0.0745022	0.0245423	23.1688
7.5'	0.270265	0.24856	27.7591		50'	0.255468	0.196217	70.737			0'	0.692805	0.659154	589.604			Acetate'	0.270265	0.224245	15.0919
7.5'	0.135134	0.106758	37.2532		50'	0.113742	0.0406254	89.6564			0'	0.311679	0.265509	698.036			Acetate'	0.135134	0.0813201	17.2515
7.5'	0.0374733	0.0221426	43.5127		50'	0.0504828	0.00553719	92.4199			0'	0.384878	0.372897	788.821			Acetate'	0.0374733	0.0133923	16.3939
7.5'	0.341152	0.298418	38.1353		50'	0.287379	0.208184	74.2106			0'	0.15216	0.12295	528.567			Acetate'	0.341152	0.267143	21.4083
7.5'	0.0320621	0.0144583	18.3359		50'	0.0321787	0.00903414	44.6444			0'	0.32908	0.31893	588.266			Acetate'	0.0320621	0.0125037	10.976
7.5'	0.0308335	0.0140942	19.4736		50'	0.0271101	0.00639089	46.6351			0'	0.326906	0.317301	544.655			Acetate'	0.0308335	0.0112323	10.902
7.5'	0.00989664	0.00277075	6.92366		50'	0.0432296	0.0155643	51.7736			0'	0.46647	0.459787	536.133			Acetate'	0.00989664	0.00149713	6.30348
7.5'	0.0238982	0.00959354	22.1095		50'	0.0454167	0.00789182	66.6955			0'	0.366503	0.356969	617.335			Acetate'	0.0238982	0.00490606	9.20188
7.5'	0.0520063	0.0285087	21.4258		50'	0.0896187	0.0303391	74.7398			0'	0.578064	0.548349	588.641			Acetate'	0.0520063	0.0166696	15.0289
7.5'	0.343704	0.309762	32.2723		50'	0.291143	0.235377	70.191			0'	0.128869	0.107894	532.189			Acetate'	0.343704	0.280987	20.1821
7.5'	0.0906226	0.0660478	35.4464		50'	0.105911	0.0559639	116.969			0'	0.360326	0.338523	721.941			Acetate'	0.0906226	0.029743	19.4919
7.5'	0.0359657	0.0187177	38.9991		50'	0.11757	0.0655566	127.995			0'	0.446992	0.437368	817.189			Acetate'	0.0359657	0.00553278	16.5499
7.5'	0.25633	0.22435	34.481		50'	0.0963133	0.0472923	92.2394			0'	0.197722	0.18592	548.17			Acetate'	0.25633	0.185973	20.3064
7.5'	0.0260841	0.0133864	19.2991		50'	0.0845349	0.0501309	68.846			0'	0.395798	0.378701	613.797			Acetate'	0.0260841	0.01026	7.14979
7.5'	0.0211676	0.00921564	12.7919		50'	0.0858275	0.0539152	72.7695			0'	0.398067	0.37818	572.124			Acetate'	0.0211676	0.00773553	5.62291
7.5'	0.0457443	0.0291282	20.0165		50'	0.16441	0.12515	82.6178			0'	0.529173	0.519948	556.352			Acetate'	0.0457443	0.0260263	14.3812
7.5'	0.0442082	0.0232415	19.3418		50'	0.114494	0.0806895	86.8465			0'	0.416805	0.408863	639.916			Acetate'	0.0442082	0.0185221	11.0477
7.5'	0.0928045	0.0463128	29.2467		50'	0.254522	0.209129	98.0415			0'	0.622402	0.610739	607.301			Acetate'	0.0928045	0.035054	27.7107
7.5'	0.260726	0.238378	25.0426		50'	0.0824995	0.0481928	88.8418			0'	0.182921	0.166989	557.453			Acetate'	0.260726	0.207987	16.2107
0'	0	0	0		100'	0.65832	0.626013	112.206			15.625'	0.412895	0.386845	816.119			BG-11'	0	0	0
0'	0.0600407	0.032559	15.7647		100'	0.553328	0.514833	126.634			15.625'	0.440203	0.431638	908.924			BG-11'	0.0600407	0.0309904	11.9284
0'	0.0969855	0.0916352	5.54535		100'	0.965617	0.928993	101.993			15.625'	0.34338	0.330748	638.238			BG-11'	0.0969855	0.0854991	5.66002
0'	0.0769649	0.0481239	21.0369		100'	0.541337	0.510186	84.2822			15.625'	0.386578	0.370152	691.187			BG-11'	0.0769649	0.0332874	15.6074
0'	0.0849934	0.056369	22.947		100'	0.491851	0.461015	84.1268			15.625'	0.376993	0.359735	643.112			BG-11'	0.0849934	0.0376976	16.1679
0'	0.124122	0.0980635	21.3707		100'	0.501841	0.478853	79.7062			15.625'	0.492654	0.470575	645.062			BG-11'	0.124122	0.0881935	10.5663
0'	0.0868503	0.0573218	14.2359		100'	0.532187	0.493612	118.106			15.625'	0.38134	0.373173	722.503			BG-11'	0.0868503	0.0545876	9.21458
0'	0.138286	0.106972	11.1801		100'	0.437082	0.4016	106.353			15.625'	0.547417	0.524418	696.677			BG-11'	0.138286	0.114865	9.09878
0'	0.133864	0.124202	9.42016		100'	0.959474	0.930159	103.478			15.625'	0.321883	0.312642	640.852			BG-11'	0.133864	0.112307	7.99933
0'	0.0600407	0.032559	15.7647		100'	0.0982411	0.052308	72.8226			15.625'	0.405689	0.379172	789.109			BG-11'	0.0600407	0.0309904	11.9284
0'	0	0	0		100'	0.0896812	0.0519783	83.0296			15.625'	0.456006	0.446798	884.182			BG-11'	0	0	0
0'	0.226822	0.186307	22.1058		100'	0.119315	0.0638396	63.8877			15.625'	0.283549	0.269256	613.226			BG-11'	0.226822	0.178684	21.492
0'	0.0110015	0.00476382	10.278		100'	0.065041	0.0386366	47.5234			15.625'	0.40395	0.385664	673.055			BG-11'	0.0110015	0.00184315	5.61574
0'	0.017471	0.00856018	12.045		100'	0.0663769	0.0427697	46.1889			15.625'	0.402579	0.382598	626.924			BG-11'	0.017471	0.00335098	7.10566
0'	0.028186	0.0182037	22.0494		100'	0.122357	0.101955	43.0718			15.625'	0.518011	0.506752	612.874			BG-11'	0.028186	0.0153845	8.97631
0'	0.0147147	0.00420393	6.19974		100'	0.0971935	0.0642546	73.4349			15.625'	0.406255	0.39925	697.076			BG-11'	0.0147147	0.00804062	2.97131
0'	0.0644099	0.0330448	21.7181		100'	0.217547	0.180498	69.3921			15.625'	0.596204	0.583822	662.27			BG-11'	0.0644099	0.0379742	18.4583
0'	0.234438	0.208932	17.0443		100'	0.104546	0.0670855	61.2337			15.625'	0.260939	0.249063	616.48			BG-11'	0.234438	0.197034	17.6852
0'	0.0969855	0.0916352	5.54535		100'	0.096404	0.0487278	77.6237			15.625'	0.492631	0.469411	782.586			BG-11'	0.0969855	0.0854991	5.66002
0'	0.226822	0.186307	22.1058		100'	0.0911848	0.0516171	88.0515			15.625'	0.566488	0.549637	877.146			BG-11'	0.226822	0.178684	21.492
0'	0	0	0		100'	0.118154	0.0604484	69.0925			15.625'	0.330077	0.317568	606.131			BG-11'	0	0	0
0'	0.219419	0.183072	22.2744		100'	0.0670979	0.0390008	51.6039			15.625'	0.516204	0.484209	666.399			BG-11'	0.219419	0.165973	18.3839
0'	0.228149	0.192583	25.2263		100'	0.067828	0.0425192	50.4067			15.625'	0.51805	0.482921	622.443			BG-11'	0.228149	0.173806	18.4019
0'	0.346158	0.304728	25.6894		100'	0.125619	0.103388	46.8841			15.625'	0.644783	0.620173	605.796			BG-11'	0.346158	0.288288	19.2569
0'	0.264397	0.223064	19.601		100'	0.100507	0.0652417	79.3034			15.625'	0.514831	0.500022	691.82			BG-11'	0.264397	0.212896	17.0285
0'	0.420687	0.370388	22.9305		100'	0.218525	0.179306	74.4206			15.625'	0.718954	0.706855	653.968			BG-11'	0.420687	0.363967	22.7855
0'	0.0143162	0.00643689	4.52925		100'	0.103704	0.0648241	66.0567			15.625'	0.308299	0.293717	610.475			BG-11'	0.0143162	0.00496451	3.30182
0'	0.0769649	0.0481239	21.0369		50'	0.512687	0.500396	83.374			15.625'	0.459746	0.439353	774.168			BG-11'	0.0769649	0.0332874	15.6074
0'	0.0110015	0.00476382	10.278		50'	0.345073	0.318208	87.6995			15.625'	0.522575	0.508579	867.895			BG-11'	0.0110015	0.00184315	5.61574
0'	0.219419	0.183072	22.2744		50'	0.636953	0.623531	64.6715			15.625'	0.32071	0.31153	596.939			BG-11'	0.219419	0.165973	18.3839
0'	0	0	0		50'	0.309584	0.285892	45.3303			15.625'	0.472046	0.444648	658.662			BG-11'	0	0	0
0'	0.00670434	0.00145782	2.77598		50'	0.308697	0.284155	49.9385			15.625'	0.473571	0.442909	615.676			BG-11'	0.00670434	0.0013119	1.22854
0'	0.0335382	0.0171253	8.01641		50'	0.27434	0.245926	62.9381			15.625'	0.590414	0.571035	597.073			BG-11'	0.0335382	0.0170194	9.20871
0'	0.0173737	0.00454823	5.89745		50'	0.290035	0.267986	61.5629			15.625'	0.468281	0.456615	682.615			BG-11'	0.0173737	0.00486335	5.37065
0'	0.0913767	0.0471832	20.8831		50'	0.362676	0.338507	74.0746			15.625'	0.663335	0.65287	645.912			BG-11'	0.0913767	0.0440674	24.4046
0'	0.216226	0.195256	15.2061		50'	0.586889	0.581599	64.1533			15.625'	0.301514	0.28885	602.712			BG-11'	0.216226	0.180189	12.7898
0'	0.0849934	0.056369	22.947		50'	0.570806	0.558244	87.6339			15.625'	0.381634	0.350968	815.35			BG-11'	0.0849934	0.0376976	16.1679
0'	0.017471	0.00856018	12.045		50'	0.386945	0.362286	92.6456			15.625'	0.371681	0.354326	908.034			BG-11'	0.017471	0.00335098	7.10566
0'	0.228149	0.192583	25.2263		50'	0.704978	0.691578	68.7198			15.625'	0.405867	0.389289	640.539			BG-11'	0.228149	0.173806	18.4019
0'	0.00670434	0.00145782	2.77598		50'	0.350142	0.328958	48.0161			15.625'	0.323413	0.299352	698.742			BG-11'	0.00670434	0.0013119	1.22854
0'	0	0	0		50'	0.348893	0.326696	55.1321			15.625'	0.309696	0.284652	650.126			BG-11'	0	0	0
0'	0.0347555	0.0196332	13.5457		50'	0.302	0.280325	60.1355			15.625'	0.389886	0.362378	642.919			BG-11'	0.0347555	0.0170679	11.626
0'	0.0164772	0.00866467	4.41537		50'	0.328042	0.307471	66.7143			15.625'	0.305368	0.287462	720.516			BG-11'	0.0164772	0.00535547	4.79095
0'	0.0892131	0.0495511	21.7104		50'	0.39371	0.372819	74.1798			15.625'	0.422173	0.391035	686.973			BG-11'	0.0892131	0.0386577	25.6352
0'	0.220686	0.20157	14.6406		50'	0.653998	0.646791	69.5978			15.625'	0.393414	0.376387	637.338			BG-11'	0.220686	0.187009	12.3667
0'	0.124122	0.0980635	21.3707		50'	0.682429	0.65214	114.085			15.625'	0.363175	0.226415	738.76			BG-11'	0.124122	0.0881935	10.5663
0'	0.028186	0.0182037	22.0494		50'	0.774556	0.749336	120.685			15.625'	0.367853	0.314722	816.523			BG-11'	0.028186	0.0153845	8.97631
0'	0.346158	0.304728	25.6894		50'	0.330996	0.290375	94.7698			15.625'	0.223991	0.12405	557.207			BG-11'	0.346158	0.288288	19.2569
0'	0.0335382	0.0171253	8.01641		50'	0.711618	0.688972	71.3263			15.625'	0.299454	0.262827	614.603			BG-11'	0.0335382	0.0170194	9.20871
0'	0.0347555	0.0196332	13.5457		50'	0.702572	0.676692	84.8584			15.625'	0.295581	0.260433	571.461			BG-11'	0.0347555	0.0170679	11.626
0'	0	0	0		50'	0.938097	0.91453	80.2194			15.625'	0.420595	0.387515	550.926			BG-11'	0	0	0
0'	0.0175521	0.00671142	11.5506		50'	0.817848	0.792485	98.7104			15.625'	0.34434	0.293899	636.823			BG-11'	0.0175521	0.0093516	5.9007
0'	0.0322185	0.0168788	10.7205		50'	1.12163	1.09369	100.095			15.625'	0.564357	0.468008	612.962			BG-11'	0.0322185	0.0152418	6.14246
0'	0.353409	0.323639	22.4698		50'	0.242213	0.220247	92.6453			15.625'	0.174173	0.110714	550.319			BG-11'	0.353409	0.304334	16.6256
0'	0.0868503	0.0573218	14.2359		100'	0.230239	0.160835	130.93			15.625'	0.281713	0.241514	758.705			BG-11'	0.0868503	0.0545876	9.21458
0'	0.0147147	0.00420393	6.19974		100'	0.233626	0.168914	148.694			15.625'	0.261106	0.236438	857.505			BG-11'	0.0147147	0.00804062	2.97131
0'	0.264397	0.223064	19.601		100'	0.140992	0.0642776	119.737			15.625'	0.382737	0.354613	586.226			BG-11'	0.264397	0.212896	17.0285
0'	0.0173737	0.00454823	5.89745		100'	0.18925	0.137682	103.792			15.625'	0.219848	0.193724	654.079			BG-11'	0.0173737	0.00486335	5.37065
0'	0.0164772	0.00866467	4.41537		100'	0.186364	0.140364	106.852			15.625'	0.200063	0.173417	607.467			BG-11'	0.0164772	0.00535547	4.79095
0'	0.0175521	0.00671142	11.5506		100'	0.280349	0.241014	112.262			15.625'	0.252643	0.233881	591.338			BG-11'	0.0175521	0.0093516	5.9007
0'	0	0	0		100'	0.236987	0.18197	139.366			15.625'	0.209994	0.187343	674.528			BG-11'	0	0	0
0'	0.0495592	0.0287387	11.2178		100'	0.420821	0.363416	135.443			15.625'	0.274644	0.241297	639.46			BG-11'	0.0495592	0.0283345	12.3897
0'	0.266295	0.241585	11.3496		100'	0.106123	0.0394418	127.483			15.625'	0.386592	0.352	594.571			BG-11'	0.266295	0.228557	13.2448
0'	0.138286	0.106972	11.1801		100'	0.117037	0.0306889	93.9155			15.625'	0.272873	0.217803	829.131			BG-11'	0.138286	0.114865	9.09878
0'	0.0644099	0.0330448	21.7181		100'	0.0625482	0.0091913	95.334			15.625'	0.288446	0.258498	919.394			BG-11'	0.0644099	0.0379742	18.4583
0'	0.420687	0.370388	22.9305		100'	0.28957	0.196322	79.7696			15.625'	0.232551	0.190848	648.298			BG-11'	0.420687	0.363967	22.7855
0'	0.0913767	0.0471832	20.8831		100'	0.0450552	0.0152694	51.2855			15.625'	0.234308	0.209938	695.792			BG-11'	0.0913767	0.0440674	24.4046
0'	0.0892131	0.0495511	21.7104		100'	0.0395724	0.0119414	50.6381			15.625'	0.232449	0.206838	653.571			BG-11'	0.0892131	0.0386577	25.6352
0'	0.0322185	0.0168788	10.7205		100'	0.0631462	0.0272881	57.0198			15.625'	0.325556	0.300374	642.833			BG-11'	0.0322185	0.0152418	6.14246
0'	0.0495592	0.0287387	11.2178		100'	0.0664008	0.0166716	73.2959			15.625'	0.248504	0.219643	728.721			BG-11'	0.0495592	0.0283345	12.3897
0'	0	0	0		100'	0.110412	0.0358883	82.189			15.625'	0.410621	0.363174	696.628			BG-11'	0	0	0
0'	0.45205	0.406705	21.2738		100'	0.296025	0.228277	74.5129			15.625'	0.219425	0.178654	648.684			BG-11'	0.45205	0.390768	22.834
0'	0.133864	0.124202	9.42016		100'	0.111442	0.0475471	113.173			15.625'	0.255134	0.199332	812.561			BG-11'	0.133864	0.112307	7.99933
0'	0.234438	0.208932	17.0443		100'	0.0822509	0.0252361	127.225			15.625'	0.245689	0.189087	914.115			BG-11'	0.234438	0.197034	17.6852
0'	0.0143162	0.00643689	4.52925		100'	0.178694	0.109565	97.1625			15.625'	0.371244	0.317652	636.179			BG-11'	0.0143162	0.00496451	3.30182
0'	0.216226	0.195256	15.2061		100'	0.0553306	0.0155575	74.3397			15.625'	0.205892	0.150811	697.904			BG-11'	0.216226	0.180189	12.7898
0'	0.220686	0.20157	14.6406		100'	0.0553727	0.0189236	77.3169			15.625'	0.192624	0.134058	652.57			BG-11'	0.220686	0.187009	12.3667
0'	0.353409	0.323639	22.4698		100'	0.0876449	0.0555069	72.5436			15.625'	0.243047	0.187407	636.771			BG-11'	0.353409	0.304334	16.6256
0'	0.266295	0.241585	11.3496		100'	0.0750715	0.0303486	102.26			15.625'	0.203585	0.143632	730.754			BG-11'	0.266295	0.228557	13.2448
0'	0.45205	0.406705	21.2738		100'	0.170922	0.119794	98.0502			15.625'	0.266868	0.198602	692.313			BG-11'	0.45205	0.390768	22.834
0'	0	0	0		100'	0.171711	0.117201	96.8485			15.625'	0.390099	0.315932	650.476			BG-11'	0	0	0
30'	0.534678	0.413022	117.614		150'	0.693341	0.657708	111.23			31.25'	0.696485	0.676385	761.612			Sodium chloride'	0.0808271	0.0439885	25.3836
30'	0.681881	0.591927	110.114		150'	0.514467	0.498823	115.55			31.25'	0.719997	0.685454	848.214			Sodium chloride'	0.0530802	0.0104357	43.8657
30'	0.299651	0.149614	105.662		150'	0.666264	0.616801	92.3557			31.25'	0.647314	0.631325	588.525			Sodium chloride'	0.268935	0.224817	21.4054
30'	0.676824	0.57511	136.353		150'	0.454717	0.442626	64.9292			31.25'	0.680189	0.628164	658.726			Sodium chloride'	0.0469249	0.0126919	30.0135
30'	0.673287	0.570518	122.496		150'	0.450256	0.438606	73.0411			31.25'	0.671449	0.61536	619.872			Sodium chloride'	0.046083	0.0111939	27.6961
30'	0.848363	0.789624	152.589		150'	0.470205	0.464868	71.9069			31.25'	0.775687	0.71256	597.803			Sodium chloride'	0.0450949	0.0181436	24.4748
30'	0.750498	0.662899	108.627		150'	0.463488	0.454369	86.5592			31.25'	0.644599	0.606436	665.048			Sodium chloride'	0.0481988	0.00846525	29.5837
30'	0.945769	0.879313	126.295		150'	0.633095	0.617699	90.1392			31.25'	0.783006	0.743308	647.167			Sodium chloride'	0.0659391	0.0188271	29.4185
30'	0.281961	0.131053	97.3478		150'	0.567733	0.537467	90.6145			31.25'	0.638195	0.610051	587.841			Sodium chloride'	0.298347	0.251326	25.7128
30'	0.19054	0.0966072	113.411		150'	0.366597	0.329001	101.914			31.25'	0.412827	0.385576	743.619			Sodium chloride'	0.19889	0.124391	43.937
30'	0.136675	0.0412457	107.85		150'	0.250952	0.176866	115.051			31.25'	0.465302	0.457328	833.104			Sodium chloride'	0.27528	0.198563	58.1243
30'	0.386184	0.277867	106.252		150'	0.538053	0.514496	77.1017			31.25'	0.281293	0.267765	568.768			Sodium chloride'	0.0673934	0.0138892	29.3389
30'	0.161621	0.0481151	130.439		150'	0.22676	0.163896	64.9928			31.25'	0.410118	0.395543	637.207			Sodium chloride'	0.231315	0.180655	37.9879
30'	0.175382	0.0642069	112.997		150'	0.233466	0.169152	70.8064			31.25'	0.409208	0.392589	595.642			Sodium chloride'	0.231523	0.18528	34.1305
30'	0.108122	0.0327885	147.401		150'	0.172252	0.110134	69.8683			31.25'	0.530738	0.519986	572.294			Sodium chloride'	0.373052	0.30159	47.1533
30'	0.131117	0.0283625	99.9722		150'	0.203443	0.138411	82.0575			31.25'	0.417001	0.410734	647.362			Sodium chloride'	0.305368	0.229867	44.9341
30'	0.123262	0.05802	121.263		150'	0.232782	0.1719	85.7292			31.25'	0.614391	0.598893	622.119			Sodium chloride'	0.507324	0.390533	60.7464
30'	0.421295	0.30773	96.3525		150'	0.538658	0.506926	81.07			31.25'	0.256267	0.247222	566.834			Sodium chloride'	0.0394787	0.00284931	28.2042
30'	0.417616	0.360113	93.9292		150'	0.240035	0.192844	105.938			31.25'	0.367337	0.329843	710.078			Sodium chloride'	0.180127	0.106614	45.6806
30'	0.520581	0.485558	81.9852		150'	0.398901	0.298713	127.593			31.25'	0.413146	0.404538	798.799			Sodium chloride'	0.243505	0.169088	59.1279
30'	0.17655	0.108654	86.5278		150'	0.0473614	0.0197431	74.0651			31.25'	0.242352	0.221601	542.477			Sodium chloride'	0.0716048	0.0150358	32.1696
30'	0.492581	0.450483	103.958		150'	0.361867	0.275097	74.995			31.25'	0.357226	0.345625	608.224			Sodium chloride'	0.200818	0.152085	39.2301
30'	0.48737	0.446747	87.909		150'	0.364431	0.27654	80.2516			31.25'	0.353307	0.342081	563.77			Sodium chloride'	0.201774	0.157025	35.76
30'	0.688524	0.641454	122.017		150'	0.526632	0.438487	83.9072			31.25'	0.478913	0.468276	547.568			Sodium chloride'	0.330097	0.263214	48.2726
30'	0.572939	0.533534	75.5185		150'	0.428792	0.34643	87.0519			31.25'	0.371719	0.364618	620.156			Sodium chloride'	0.270017	0.19755	46.1523
30'	0.823816	0.7612	100.87		150'	0.627691	0.551858	93.6381			31.25'	0.57019	0.545394	596.521			Sodium chloride'	0.4611	0.350119	61.8199
30'	0.112797	0.074856	62.8118		150'	0.0532512	0.0131128	79.1759			31.25'	0.216049	0.203408	538.864			Sodium chloride'	0.044429	0.0047073	30.6796
30'	0.28228	0.064223	109.526		50'	0.229598	0.197053	94.8074			31.25'	0.400508	0.367332	767.362			Sodium chloride'	0.0948788	0.0541039	32.6579
30'	0.34072	0.128577	104.564		50'	0.149111	0.0847167	106.91			31.25'	0.390882	0.383051	851.77			Sodium chloride'	0.0845785	0.0199035	58.9565
30'	0.269799	0.0463774	104.381		50'	0.448251	0.423373	80.4843			31.25'	0.375916	0.357313	595.11			Sodium chloride'	0.283659	0.241206	24.8876
30'	0.329236	0.128414	128.471		50'	0.140339	0.0871662	57.9027			31.25'	0.336473	0.327093	652.349			Sodium chloride'	0.078482	0.0210907	44.2738
30'	0.331318	0.144103	111.537		50'	0.145922	0.0917286	70.0168			31.25'	0.328892	0.318934	608.742			Sodium chloride'	0.0762031	0.0178249	42.1206
30'	0.434265	0.213384	148.462		50'	0.0872795	0.0349905	65.2368			31.25'	0.422135	0.406117	593.403			Sodium chloride'	0.0700306	0.0253318	35.5044
30'	0.31169	0.153983	91.0259		50'	0.121068	0.0616572	89.6596			31.25'	0.327313	0.318629	665.349			Sodium chloride'	0.074627	0.0129684	42.3851
30'	0.451762	0.267655	114.758		50'	0.115208	0.0606506	85.6541			31.25'	0.482741	0.453185	647.562			Sodium chloride'	0.0786189	0.018531	38.2188
30'	0.280566	0.0670822	92.2719		50'	0.470835	0.443018	87.1006			31.25'	0.35288	0.340844	591.643			Sodium chloride'	0.32456	0.269051	32.5044
30'	0.0468404	0.0357206	46.8234		50'	0.25935	0.210419	132.497			31.25'	0.372044	0.339462	781.7			Sodium chloride'	0.523995	0.437766	54.119
30'	0.137825	0.103212	50.8212		50'	0.170573	0.0911933	143.452			31.25'	0.361352	0.35292	870.883			Sodium chloride'	0.64863	0.566803	74.7767
30'	0.0891073	0.0800757	45.2626		50'	0.477164	0.439448	110.301			31.25'	0.366097	0.347343	610.358			Sodium chloride'	0.308657	0.190582	39.2755
30'	0.145917	0.114662	76.5601		50'	0.151713	0.0905877	81.4077			31.25'	0.30886	0.297386	675.012			Sodium chloride'	0.623368	0.544275	55.9997
30'	0.148347	0.12044	64.5659		50'	0.148227	0.0882446	87.8674			31.25'	0.299849	0.287284	629.706			Sodium chloride'	0.615811	0.535088	52.5912
30'	0.234679	0.194236	92.4754		50'	0.111986	0.0394738	101.569			31.25'	0.38367	0.371325	609.304			Sodium chloride'	0.785938	0.726585	54.2028
30'	0.175769	0.142398	52.3589		50'	0.137445	0.0660782	117.015			31.25'	0.297549	0.289562	682.327			Sodium chloride'	0.706051	0.62968	60.1964
30'	0.260145	0.20604	70.1665		50'	0.134695	0.0570519	125.908			31.25'	0.438691	0.413691	660.941			Sodium chloride'	0.896907	0.826777	62.1894
30'	0.122404	0.112343	44.5008		50'	0.487995	0.452402	110.48			31.25'	0.346247	0.332559	607.802			Sodium chloride'	0.286001	0.157271	39.1824
30'	0.216478	0.152333	93.0364		50'	0.207171	0.142135	136.368			31.25'	0.402313	0.352243	774.054			Sodium chloride'	0.608577	0.503502	68.4378
30'	0.297794	0.242	90.1694		50'	0.189418	0.0866202	149.7			31.25'	0.420756	0.407519	862.621			Sodium chloride'	0.733186	0.635719	88.9581
30'	0.115961	0.0296495	91.1936		50'	0.460776	0.391245	126.447			31.25'	0.298953	0.270315	594.576			Sodium chloride'	0.378301	0.238249	51.2814
30'	0.286768	0.225556	109.371		50'	0.203254	0.102429	98.1021			31.25'	0.362812	0.347539	666.252			Sodium chloride'	0.705137	0.611301	68.7124
30'	0.280968	0.222758	85.1635		50'	0.195219	0.0925307	105.402			31.25'	0.360265	0.34391	623.898			Sodium chloride'	0.695548	0.599441	65.4898
30'	0.403891	0.366694	128.957		50'	0.177813	0.0691623	111.874			31.25'	0.46304	0.457753	592.963			Sodium chloride'	0.871	0.800202	66.8575
30'	0.33553	0.283324	79.9765		50'	0.18427	0.0867281	120.454			31.25'	0.36683	0.356915	673.003			Sodium chloride'	0.791182	0.699757	73.3787
30'	0.488673	0.441915	102.735		50'	0.125056	0.0376243	119.397			31.25'	0.555577	0.529739	647.711			Sodium chloride'	0.984746	0.901351	76.2653
30'	0.10707	0.0177741	78.5669		50'	0.486167	0.432224	121.799			31.25'	0.269349	0.251382	595.192			Sodium chloride'	0.352477	0.200225	52.5842
30'	0.5294	0.51218	106.815		150'	0.529131	0.501537	105.833			31.25'	0.500278	0.456874	736.365			Sodium chloride'	0.112	0.0382391	31.2535
30'	0.604741	0.592897	103.555		150'	0.444772	0.400311	115.875			31.25'	0.420939	0.410557	819.31			Sodium chloride'	0.0507557	0.00378871	38.1704
30'	0.529411	0.500844	100.388		150'	0.816697	0.794981	84.8799			31.25'	0.671793	0.650443	561.008			Sodium chloride'	0.259015	0.183721	25.8473
30'	0.591117	0.577278	127.142		150'	0.432498	0.396444	65.5689			31.25'	0.38031	0.366326	622.394			Sodium chloride'	0.0270615	0.00264146	20.1311
30'	0.59463	0.581219	109.753		150'	0.388954	0.353981	72.3291			31.25'	0.346075	0.332956	581.79			Sodium chloride'	0.0226613	0.000547261	17.4887
30'	0.687719	0.683196	143.284		150'	0.411942	0.371354	87.8246			31.25'	0.388218	0.373121	568.348			Sodium chloride'	0.0510704	0.0163551	24.3329
30'	0.650408	0.638066	96.2674		150'	0.40991	0.380977	84.3896			31.25'	0.345508	0.33794	636.436			Sodium chloride'	0.0476022	0.00508816	25.7333
30'	0.742951	0.724013	115.188		150'	0.341877	0.306564	94.1777			31.25'	0.368111	0.338445	622.386			Sodium chloride'	0.112759	0.0322693	37.5733
30'	0.549136	0.526559	88.4994		150'	0.819356	0.800509	89.8881			31.25'	0.659401	0.649616	564.523			Sodium chloride'	0.255468	0.199354	21.5733
30'	0.483987	0.466457	102.751		150'	0.0721805	0.0407303	77.657			31.25'	0.401249	0.375941	705.305			Sodium chloride'	0.114118	0.0470514	31.3418
30'	0.550666	0.541392	96.3328		150'	0.0794122	0.0401355	86.6009			31.25'	0.454002	0.444125	791.448			Sodium chloride'	0.0504828	0.00612352	39.959
30'	0.514153	0.485591	98.1229		150'	0.101335	0.0690022	63.5574			31.25'	0.274724	0.263346	528.631			Sodium chloride'	0.287379	0.213317	26.776
30'	0.542666	0.531036	123.579		150'	0.0591103	0.0292754	41.6147			31.25'	0.401427	0.383781	598.75			Sodium chloride'	0.0321787	0.00671968	23.1509
30'	0.545249	0.533544	106.7		150'	0.0632403	0.0353487	54.2543			31.25'	0.402033	0.381694	563.777			Sodium chloride'	0.0271101	0.00346417	20.1613
30'	0.631931	0.627779	141.737		150'	0.117697	0.0880102	59.7115			31.25'	0.516124	0.505593	538.159			Sodium chloride'	0.0432296	0.0129578	25.1668
30'	0.600253	0.587335	92.9933		150'	0.0756212	0.0518582	64.0415			31.25'	0.405176	0.397826	610.569			Sodium chloride'	0.0454167	0.00588474	26.5267
30'	0.677817	0.654742	113.387		150'	0.192113	0.163487	69.3631			31.25'	0.598341	0.584517	591.429			Sodium chloride'	0.0896187	0.0207701	36.2574
30'	0.537015	0.516268	86.7887		150'	0.100116	0.0772332	70.0076			31.25'	0.256037	0.243164	536.472			Sodium chloride'	0.291143	0.231851	24.2095
30'	0.457409	0.442896	78.581		150'	0.033762	0.00770024	47.1126			31.25'	0.345127	0.292858	714.535			Sodium chloride'	0.10048	0.0551144	34.4091
30'	0.521467	0.507129	75.4882		150'	0.105665	0.0492364	59.0877			31.25'	0.381069	0.366202	800.342			Sodium chloride'	0.11757	0.0772393	51.9191
30'	0.415204	0.388041	73.7126		150'	0.0701652	0.0527192	31.0674			31.25'	0.224427	0.192274	537.819			Sodium chloride'	0.0963133	0.0515176	26.2021
30'	0.495994	0.479044	92.4451		150'	0.0935931	0.0481866	26.1042			31.25'	0.323536	0.310007	606.279			Sodium chloride'	0.0845349	0.0600176	33.7311
30'	0.501167	0.485276	75.5971		150'	0.0963046	0.0504735	29.4603			31.25'	0.322455	0.308079	567.687			Sodium chloride'	0.0858275	0.0640762	28.1074
30'	0.594947	0.587713	108.342		150'	0.169892	0.121423	37.4155			31.25'	0.435263	0.430053	542.206			Sodium chloride'	0.16441	0.132558	37.2947
30'	0.553984	0.539404	66.6821		150'	0.122644	0.0762375	39.4613			31.25'	0.341927	0.330355	619.252			Sodium chloride'	0.114494	0.0784415	34.5153
30'	0.681785	0.662427	86.7465		150'	0.213934	0.167988	46.6899			31.25'	0.539316	0.509177	598.138			Sodium chloride'	0.254522	0.193101	43.4484
30'	0.42075	0.396747	61.9463		150'	0.0974194	0.0794167	35.8763			31.25'	0.19762	0.175398	541.953			Sodium chloride'	0.0824995	0.0508355	23.0654
																	Sodium chloride'	0.673123	0.597715	66.5697
																	Sodium chloride'	0.553328	0.46962	82.2183
																	Sodium chloride'	0.965617	0.915773	56.8929
																	Sodium chloride'	0.541337	0.476077	65.3194
																	Sodium chloride'	0.491851	0.429876	62.4415
																	Sodium chloride'	0.501841	0.421127	62.2926
																	Sodium chloride'	0.532187	0.449007	66.407
																	Sodium chloride'	0.437082	0.319287	67.0061
																	Sodium chloride'	0.959474	0.928336	57.4039
																	Sodium chloride'	0.0936085	0.0448472	24.597
																	Sodium chloride'	0.0896812	0.0476926	37.1051
																	Sodium chloride'	0.119315	0.0675088	21.6692
																	Sodium chloride'	0.065041	0.0366828	24.9995
																	Sodium chloride'	0.0663769	0.0412967	21.3256
																	Sodium chloride'	0.122357	0.0941827	23.3485
																	Sodium chloride'	0.0971935	0.0594887	24.3245
																	Sodium chloride'	0.217547	0.158665	29.633
																	Sodium chloride'	0.104546	0.0654238	18.7547
																	Sodium chloride'	0.091726	0.0417821	26.7606
																	Sodium chloride'	0.0911848	0.0469602	39.6218
																	Sodium chloride'	0.118154	0.0643329	23.9163
																	Sodium chloride'	0.0670979	0.0366689	26.8864
																	Sodium chloride'	0.067828	0.0407504	23.2508
																	Sodium chloride'	0.125619	0.0953916	25.6584
																	Sodium chloride'	0.100507	0.0606428	26.7897
																	Sodium chloride'	0.218525	0.158252	31.8106
																	Sodium chloride'	0.103704	0.062897	20.9206
																	Sodium chloride'	0.514421	0.41734	57.3233
																	Sodium chloride'	0.345073	0.259737	65.934
																	Sodium chloride'	0.636953	0.533458	46.2204
																	Sodium chloride'	0.309584	0.231551	47.7882
																	Sodium chloride'	0.308697	0.225714	42.6172
																	Sodium chloride'	0.27434	0.199179	51.7804
																	Sodium chloride'	0.290035	0.210421	49.3364
																	Sodium chloride'	0.362676	0.268566	61.9173
																	Sodium chloride'	0.586889	0.490964	40.3155
																	Sodium chloride'	0.573101	0.468209	59.2651
																	Sodium chloride'	0.386945	0.296453	67.5229
																	Sodium chloride'	0.704978	0.594504	47.0693
																	Sodium chloride'	0.350142	0.267569	48.5586
																	Sodium chloride'	0.348893	0.260796	45.0316
																	Sodium chloride'	0.302	0.226805	49.8984
																	Sodium chloride'	0.328042	0.243388	51.4585
																	Sodium chloride'	0.39371	0.296339	61.8214
																	Sodium chloride'	0.653998	0.548863	43.0842
																	Sodium chloride'	0.668638	0.530998	71.9673
																	Sodium chloride'	0.774556	0.655261	81.3988
																	Sodium chloride'	0.330996	0.225507	54.695
																	Sodium chloride'	0.711618	0.618399	62.8927
																	Sodium chloride'	0.702572	0.613136	60.7854
																	Sodium chloride'	0.938097	0.811394	64.746
																	Sodium chloride'	0.817848	0.698227	67.8351
																	Sodium chloride'	1.12163	0.939705	78.5921
																	Sodium chloride'	0.242213	0.176363	48.5601
																	Sodium chloride'	0.223241	0.126159	72.1992
																	Sodium chloride'	0.233626	0.145046	94.7064
																	Sodium chloride'	0.140992	0.0596782	61.7984
																	Sodium chloride'	0.18925	0.12221	82.4411
																	Sodium chloride'	0.186364	0.126643	70.1918
																	Sodium chloride'	0.280349	0.208261	72.6801
																	Sodium chloride'	0.236987	0.153304	70.3849
																	Sodium chloride'	0.420821	0.300051	74.7689
																	Sodium chloride'	0.106123	0.0393039	62.9141
																	Sodium chloride'	0.117065	0.0378488	39.1315
																	Sodium chloride'	0.0625482	0.00622787	47.601
																	Sodium chloride'	0.28957	0.205198	33.3849
																	Sodium chloride'	0.0450552	0.0104591	30.4129
																	Sodium chloride'	0.0395724	0.00709222	27.4135
																	Sodium chloride'	0.0631462	0.0205624	32.2356
																	Sodium chloride'	0.0664008	0.0148398	34.093
																	Sodium chloride'	0.110412	0.0257201	44.5177
																	Sodium chloride'	0.296025	0.227288	31.2659
																	Sodium chloride'	0.108417	0.0471743	36.0501
																	Sodium chloride'	0.0822509	0.0277559	53.2982
																	Sodium chloride'	0.178694	0.113234	30.3455
																	Sodium chloride'	0.0553306	0.0162918	38.3868
																	Sodium chloride'	0.0553727	0.0189529	33.9291
																	Sodium chloride'	0.0876449	0.0541994	33.7852
																	Sodium chloride'	0.0750715	0.0256537	36.2433
																	Sodium chloride'	0.170922	0.10376	39.54
																	Sodium chloride'	0.171711	0.114456	30.3532
																	Sodium chloride'	0.690085	0.542984	69.2104
																	Sodium chloride'	0.514467	0.415713	69.0786
																	Sodium chloride'	0.666264	0.520822	58.4082
																	Sodium chloride'	0.454717	0.373025	54.1498
																	Sodium chloride'	0.450256	0.366929	48.3089
																	Sodium chloride'	0.470205	0.387311	52.0489
																	Sodium chloride'	0.463488	0.37121	51.6193
																	Sodium chloride'	0.633095	0.499673	65.4777
																	Sodium chloride'	0.567733	0.451488	50.4501
																	Sodium chloride'	0.368977	0.277437	61.5379
																	Sodium chloride'	0.250952	0.141947	82.1912
																	Sodium chloride'	0.538053	0.442088	44.9836
																	Sodium chloride'	0.22676	0.123819	60.5844
																	Sodium chloride'	0.233466	0.123666	59.5336
																	Sodium chloride'	0.172252	0.0877477	59.5899
																	Sodium chloride'	0.203443	0.100139	65.6261
																	Sodium chloride'	0.232782	0.138826	70.5588
																	Sodium chloride'	0.538658	0.424034	50.3653
																	Sodium chloride'	0.230964	0.177761	49.5857
																	Sodium chloride'	0.398901	0.302121	81.4027
																	Sodium chloride'	0.0473614	0.0231762	27.7308
																	Sodium chloride'	0.361867	0.280427	60.317
																	Sodium chloride'	0.364431	0.284942	58.4641
																	Sodium chloride'	0.526632	0.43418	61.7434
																	Sodium chloride'	0.428792	0.332265	64.9799
																	Sodium chloride'	0.627691	0.514252	69.1109
																	Sodium chloride'	0.0532512	0.0210613	34.9403
																	Sodium chloride'	0.232162	0.15862	51.7527
																	Sodium chloride'	0.149111	0.052652	74.7554
																	Sodium chloride'	0.448251	0.35913	41.2113
																	Sodium chloride'	0.140339	0.0473546	54.8364
																	Sodium chloride'	0.145922	0.0471944	53.0567
																	Sodium chloride'	0.0872795	0.0156817	52.5991
																	Sodium chloride'	0.121068	0.0308462	58.3274
																	Sodium chloride'	0.115208	0.0426965	59.2417
																	Sodium chloride'	0.470835	0.36231	46.7379
																	Sodium chloride'	0.262564	0.178487	80.4765
																	Sodium chloride'	0.170573	0.0660631	102.258
																	Sodium chloride'	0.477164	0.384464	65.4205
																	Sodium chloride'	0.151713	0.0591901	77.0104
																	Sodium chloride'	0.148227	0.052832	71.6963
																	Sodium chloride'	0.111986	0.0253452	85.8803
																	Sodium chloride'	0.137445	0.0395734	82.6466
																	Sodium chloride'	0.134695	0.0395817	94.7276
																	Sodium chloride'	0.487995	0.384855	67.927
																	Sodium chloride'	0.210592	0.100409	91.7456
																	Sodium chloride'	0.189418	0.044967	125.928
																	Sodium chloride'	0.460776	0.311177	93.5529
																	Sodium chloride'	0.203254	0.0515418	106.833
																	Sodium chloride'	0.195219	0.038889	100.244
																	Sodium chloride'	0.177813	0.0436724	102.283
																	Sodium chloride'	0.18427	0.0490399	103.236
																	Sodium chloride'	0.125056	0.0232797	90.9047
																	Sodium chloride'	0.486167	0.332878	87.9631
																	Acetate'	0.534678	0.485291	27.094
																	Acetate'	0.681881	0.633361	34.554
																	Acetate'	0.299651	0.212321	20.3844
																	Acetate'	0.676824	0.611291	32.1081
																	Acetate'	0.673287	0.604137	31.6461
																	Acetate'	0.848363	0.807533	31.3438
																	Acetate'	0.750498	0.704165	30.6874
																	Acetate'	0.945769	0.915122	37.6448
																	Acetate'	0.281961	0.179822	21.6828
																	Acetate'	0.19054	0.128184	27.3913
																	Acetate'	0.136675	0.038642	29.7007
																	Acetate'	0.386184	0.306293	30.2995
																	Acetate'	0.161621	0.0369094	37.5821
																	Acetate'	0.175382	0.0418158	43.2441
																	Acetate'	0.108122	0.0162092	34.0831
																	Acetate'	0.131117	0.0322654	34.3173
																	Acetate'	0.123262	0.0591638	39.7065
																	Acetate'	0.421295	0.310509	39.404
																	Acetate'	0.417616	0.334138	34.3751
																	Acetate'	0.520581	0.450699	28.4066
																	Acetate'	0.17655	0.106312	32.4032
																	Acetate'	0.492581	0.426129	29.4997
																	Acetate'	0.48737	0.424579	27.4502
																	Acetate'	0.688524	0.595874	38.4941
																	Acetate'	0.572939	0.501076	26.852
																	Acetate'	0.823816	0.705591	47.3785
																	Acetate'	0.112797	0.0765639	24.1482
																	Acetate'	0.28228	0.20543	66.0543
																	Acetate'	0.34072	0.291328	64.582
																	Acetate'	0.269799	0.164396	61.8847
																	Acetate'	0.329236	0.26262	62.611
																	Acetate'	0.331318	0.261268	55.5542
																	Acetate'	0.434265	0.374171	77.9492
																	Acetate'	0.31169	0.266082	51.248
																	Acetate'	0.451762	0.396719	81.0616
																	Acetate'	0.280566	0.180614	66.781
																	Acetate'	0.0468404	0.0266689	21.6186
																	Acetate'	0.137825	0.109099	20.3708
																	Acetate'	0.0891073	0.0684962	23.5172
																	Acetate'	0.145917	0.113095	25.6252
																	Acetate'	0.148347	0.114955	25.9439
																	Acetate'	0.234679	0.202005	35.758
																	Acetate'	0.175769	0.147305	22.1623
																	Acetate'	0.260145	0.219422	42.9438
																	Acetate'	0.122404	0.102887	26.0628
																	Acetate'	0.216478	0.168938	39.6396
																	Acetate'	0.297794	0.253583	43.9223
																	Acetate'	0.115961	0.0421716	35.8844
																	Acetate'	0.286768	0.237114	41.3032
																	Acetate'	0.280968	0.234025	36.0592
																	Acetate'	0.403891	0.369018	49.9862
																	Acetate'	0.33553	0.294805	37.3826
																	Acetate'	0.488673	0.447181	56.4615
																	Acetate'	0.10707	0.0277719	36.256
																	Acetate'	0.5294	0.129891	57.4036
																	Acetate'	0.604741	0.259553	61.8445
																	Acetate'	0.529411	0.119305	55.9236
																	Acetate'	0.591117	0.266004	52.7086
																	Acetate'	0.59463	0.260169	52.141
																	Acetate'	0.687719	0.390775	52.4802
																	Acetate'	0.650408	0.319042	54.1833
																	Acetate'	0.742951	0.396854	62.9827
																	Acetate'	0.549136	0.15486	57.071
																	Acetate'	0.483987	0.124949	51.8749
																	Acetate'	0.550666	0.24618	52.2592
																	Acetate'	0.514153	0.1439	52.5012
																	Acetate'	0.542666	0.256889	45.1891
																	Acetate'	0.545249	0.250461	45.4657
																	Acetate'	0.631931	0.371026	46.9532
																	Acetate'	0.600253	0.308307	47.605
																	Acetate'	0.677817	0.368912	58.5362
																	Acetate'	0.537015	0.183866	52.7981
																	Acetate'	0.457409	0.0896618	57.0335
																	Acetate'	0.521467	0.204038	63.7157
																	Acetate'	0.415204	0.0417807	53.4554
																	Acetate'	0.495994	0.20043	52.6862
																	Acetate'	0.501167	0.198682	50.4921
																	Acetate'	0.594947	0.326122	53.2328
																	Acetate'	0.553984	0.249529	53.8419
																	Acetate'	0.681785	0.359429	63.7649
																	Acetate'	0.42075	0.0625851	54.5144
																	Magnesium sulfate'	0.739968	0.619418	153.148
																	Magnesium sulfate'	0.642092	0.536176	168.257
																	Magnesium sulfate'	0.992706	0.819983	140.534
																	Magnesium sulfate'	0.640093	0.526652	150.57
																	Magnesium sulfate'	0.592825	0.475783	139.445
																	Magnesium sulfate'	0.604526	0.521247	159.238
																	Magnesium sulfate'	0.60717	0.507498	143.859
																	Magnesium sulfate'	0.514732	0.432789	160.882
																	Magnesium sulfate'	1.00446	0.817421	146.979
																	Magnesium sulfate'	0.19285	0.126341	172.85
																	Magnesium sulfate'	0.284023	0.197515	195.149
																	Magnesium sulfate'	0.124791	0.0697167	150.382
																	Magnesium sulfate'	0.241778	0.171846	177.233
																	Magnesium sulfate'	0.241575	0.173483	168.048
																	Magnesium sulfate'	0.351871	0.279616	189.105
																	Magnesium sulfate'	0.272954	0.187978	170.443
																	Magnesium sulfate'	0.430798	0.327814	197.763
																	Magnesium sulfate'	0.134842	0.0749449	166.238
																	Magnesium sulfate'	0.756295	0.694361	136.154
																	Magnesium sulfate'	0.674794	0.594157	155.867
																	Magnesium sulfate'	1.01511	0.982511	117.621
																	Magnesium sulfate'	0.655423	0.587174	138.901
																	Magnesium sulfate'	0.603278	0.536847	132.812
																	Magnesium sulfate'	0.63594	0.553154	142.13
																	Magnesium sulfate'	0.624741	0.543089	132.921
																	Magnesium sulfate'	0.543001	0.430504	145.151
																	Magnesium sulfate'	1.02249	0.999528	127.711
																	Magnesium sulfate'	0.563732	0.487464	148.977
																	Magnesium sulfate'	0.484576	0.401147	164.803
																	Magnesium sulfate'	0.804174	0.753884	130.483
																	Magnesium sulfate'	0.45709	0.394279	146.59
																	Magnesium sulfate'	0.413119	0.354569	139.808
																	Magnesium sulfate'	0.442744	0.368207	153.873
																	Magnesium sulfate'	0.437705	0.354834	142.419
																	Magnesium sulfate'	0.389407	0.270027	161.478
																	Magnesium sulfate'	0.81291	0.773622	141.351
																	Magnesium sulfate'	0.461403	0.421968	176.693
																	Magnesium sulfate'	0.394532	0.355016	190.962
																	Magnesium sulfate'	0.657565	0.623555	159.056
																	Magnesium sulfate'	0.363027	0.333551	173.645
																	Magnesium sulfate'	0.333748	0.30458	166.203
																	Magnesium sulfate'	0.360419	0.328239	185.291
																	Magnesium sulfate'	0.324184	0.28628	166.266
																	Magnesium sulfate'	0.321432	0.260774	191.244
																	Magnesium sulfate'	0.665983	0.638241	170.096
																	Magnesium sulfate'	0.258238	0.20837	158.687
																	Magnesium sulfate'	0.31602	0.261663	177.886
																	Magnesium sulfate'	0.199346	0.155909	138.007
																	Magnesium sulfate'	0.266628	0.227581	159.231
																	Magnesium sulfate'	0.261736	0.224518	151.008
																	Magnesium sulfate'	0.370963	0.328015	171.209
																	Magnesium sulfate'	0.28069	0.229556	152.338
																	Magnesium sulfate'	0.441429	0.367026	178.611
																	Magnesium sulfate'	0.192988	0.154965	148.195
																	Magnesium sulfate'	0.723249	0.399987	202.944
																	Magnesium sulfate'	0.690639	0.433803	200.408
																	Magnesium sulfate'	0.706804	0.297744	184.827
																	Magnesium sulfate'	0.659361	0.3907	177.333
																	Magnesium sulfate'	0.645623	0.368758	172.716
																	Magnesium sulfate'	0.722687	0.500499	192.811
																	Magnesium sulfate'	0.646843	0.399381	179.351
																	Magnesium sulfate'	0.759817	0.532405	209.794
																	Magnesium sulfate'	0.692805	0.268565	195.305
																	Magnesium sulfate'	0.302288	0.246596	141.114
																	Magnesium sulfate'	0.384878	0.325938	158.264
																	Magnesium sulfate'	0.15216	0.106742	119.896
																	Magnesium sulfate'	0.32908	0.287935	137.087
																	Magnesium sulfate'	0.326906	0.289076	131.202
																	Magnesium sulfate'	0.46647	0.419462	148.325
																	Magnesium sulfate'	0.366503	0.310308	135.729
																	Magnesium sulfate'	0.578064	0.495196	159.075
																	Magnesium sulfate'	0.128869	0.0921037	129.255
																	Magnesium sulfate'	0.350916	0.320484	155.205
																	Magnesium sulfate'	0.446992	0.40736	174.778
																	Magnesium sulfate'	0.197722	0.166963	134.176
																	Magnesium sulfate'	0.395798	0.363697	153.073
																	Magnesium sulfate'	0.398067	0.365219	149.885
																	Magnesium sulfate'	0.529173	0.501752	161.657
																	Magnesium sulfate'	0.416805	0.379483	152.066
																	Magnesium sulfate'	0.622402	0.575835	170.29
																	Magnesium sulfate'	0.182921	0.152722	146.404
																	Magnesium sulfate'	0.40767	0.369907	195.91
																	Magnesium sulfate'	0.440203	0.415571	206.962
																	Magnesium sulfate'	0.34338	0.300015	175.627
																	Magnesium sulfate'	0.386578	0.370449	181.363
																	Magnesium sulfate'	0.376993	0.36129	177.247
																	Magnesium sulfate'	0.492654	0.473712	199.367
																	Magnesium sulfate'	0.38134	0.360136	183.541
																	Magnesium sulfate'	0.547417	0.504095	210.499
																	Magnesium sulfate'	0.321883	0.290749	184.646
																	Magnesium sulfate'	0.397664	0.364067	168.173
																	Magnesium sulfate'	0.456006	0.426918	185.207
																	Magnesium sulfate'	0.283549	0.24013	149.823
																	Magnesium sulfate'	0.40395	0.379477	162.685
																	Magnesium sulfate'	0.402579	0.377199	159.608
																	Magnesium sulfate'	0.518011	0.501078	171.449
																	Magnesium sulfate'	0.406255	0.381156	161.161
																	Magnesium sulfate'	0.596204	0.561952	178.68
																	Magnesium sulfate'	0.260939	0.224245	159.226
																	Magnesium sulfate'	0.483245	0.4551	164.546
																	Magnesium sulfate'	0.566488	0.538847	186.188
																	Magnesium sulfate'	0.330077	0.286479	145.504
																	Magnesium sulfate'	0.516204	0.486139	163.637
																	Magnesium sulfate'	0.51805	0.484641	160.654
																	Magnesium sulfate'	0.644783	0.62746	167.314
																	Magnesium sulfate'	0.514831	0.491447	159.553
																	Magnesium sulfate'	0.718954	0.696948	170.931
																	Magnesium sulfate'	0.308299	0.267173	156.604
																	Magnesium sulfate'	0.451195	0.423817	159.696
																	Magnesium sulfate'	0.522575	0.496716	180.762
																	Magnesium sulfate'	0.32071	0.279446	139.841
																	Magnesium sulfate'	0.472046	0.445721	158.166
																	Magnesium sulfate'	0.473571	0.444204	155.058
																	Magnesium sulfate'	0.590414	0.57644	161.569
																	Magnesium sulfate'	0.468281	0.446803	154.244
																	Magnesium sulfate'	0.663335	0.640648	165.753
																	Magnesium sulfate'	0.301514	0.262598	150.644
																	Magnesium sulfate'	0.379997	0.328783	189.793
																	Magnesium sulfate'	0.371681	0.335637	207.339
																	Magnesium sulfate'	0.405867	0.350015	167.821
																	Magnesium sulfate'	0.323413	0.297404	184.9
																	Magnesium sulfate'	0.309696	0.284772	177.87
																	Magnesium sulfate'	0.389886	0.362771	190.104
																	Magnesium sulfate'	0.305368	0.272348	178.261
																	Magnesium sulfate'	0.422173	0.366037	193.917
																	Magnesium sulfate'	0.393414	0.349623	172.393
																	Magnesium sulfate'	0.354137	0.23859	152.843
																	Magnesium sulfate'	0.367853	0.277808	157.548
																	Magnesium sulfate'	0.223991	0.122637	131.171
																	Magnesium sulfate'	0.299454	0.239037	134.719
																	Magnesium sulfate'	0.295581	0.238283	134.312
																	Magnesium sulfate'	0.420595	0.347701	146.582
																	Magnesium sulfate'	0.34434	0.256675	141.001
																	Magnesium sulfate'	0.564357	0.429171	166.037
																	Magnesium sulfate'	0.174173	0.0975117	131.892
																	Magnesium sulfate'	0.284076	0.213952	153.87
																	Magnesium sulfate'	0.261106	0.188117	172.613
																	Magnesium sulfate'	0.382737	0.326106	133.523
																	Magnesium sulfate'	0.219848	0.164965	153.033
																	Magnesium sulfate'	0.200063	0.149616	145.185
																	Magnesium sulfate'	0.252643	0.194881	159.308
																	Magnesium sulfate'	0.209994	0.139587	147.266
																	Magnesium sulfate'	0.274644	0.176978	165.293
																	Magnesium sulfate'	0.386592	0.335624	142.412
																	Magnesium sulfate'	0.266121	0.191166	183.429
																	Magnesium sulfate'	0.288446	0.224224	197.844
																	Magnesium sulfate'	0.232551	0.157819	159.964
																	Magnesium sulfate'	0.234308	0.190473	175.745
																	Magnesium sulfate'	0.232449	0.190279	168.981
																	Magnesium sulfate'	0.325556	0.276464	186.507
																	Magnesium sulfate'	0.248504	0.188231	171.659
																	Magnesium sulfate'	0.410621	0.322649	197.289
																	Magnesium sulfate'	0.219425	0.154886	166.712
																	Magnesium sulfate'	0.255737	0.166326	195.733
																	Magnesium sulfate'	0.245689	0.162114	210.959
																	Magnesium sulfate'	0.371244	0.290103	172.672
																	Magnesium sulfate'	0.205892	0.144639	190.606
																	Magnesium sulfate'	0.192624	0.133662	184.867
																	Magnesium sulfate'	0.243047	0.179908	197.224
																	Magnesium sulfate'	0.203585	0.122194	185.861
																	Magnesium sulfate'	0.266868	0.157211	208.347
																	Magnesium sulfate'	0.390099	0.312859	185.816
																	Magnesium sulfate'	0.689985	0.569612	210.873
																	Magnesium sulfate'	0.719997	0.63479	229.682
																	Magnesium sulfate'	0.647314	0.470435	192.16
																	Magnesium sulfate'	0.680189	0.58181	211.742
																	Magnesium sulfate'	0.671449	0.565262	208.088
																	Magnesium sulfate'	0.775687	0.703134	212.007
																	Magnesium sulfate'	0.644599	0.56621	197.656
																	Magnesium sulfate'	0.783006	0.716253	212.425
																	Magnesium sulfate'	0.638195	0.459854	197.832
																	Magnesium sulfate'	0.404204	0.367703	151.953
																	Magnesium sulfate'	0.465302	0.434326	172.944
																	Magnesium sulfate'	0.281293	0.236914	132.88
																	Magnesium sulfate'	0.410118	0.386687	153.031
																	Magnesium sulfate'	0.409208	0.384626	149.793
																	Magnesium sulfate'	0.530738	0.511527	157.242
																	Magnesium sulfate'	0.417001	0.389968	146.806
																	Magnesium sulfate'	0.614391	0.574171	161.977
																	Magnesium sulfate'	0.256267	0.220649	137.536
																	Magnesium sulfate'	0.359036	0.312136	145.689
																	Magnesium sulfate'	0.413146	0.375161	165.244
																	Magnesium sulfate'	0.242352	0.193967	126.64
																	Magnesium sulfate'	0.357226	0.331282	147.46
																	Magnesium sulfate'	0.353307	0.329287	140.512
																	Magnesium sulfate'	0.478913	0.45146	153.517
																	Magnesium sulfate'	0.371719	0.337429	138.046
																	Magnesium sulfate'	0.57019	0.513092	158.409
																	Magnesium sulfate'	0.216049	0.179262	131.605
																	Magnesium sulfate'	0.394996	0.333887	180.663
																	Magnesium sulfate'	0.390882	0.360564	191.912
																	Magnesium sulfate'	0.375916	0.299268	162.793
																	Magnesium sulfate'	0.336473	0.317884	172.052
																	Magnesium sulfate'	0.328892	0.310408	167.647
																	Magnesium sulfate'	0.422135	0.403759	181.944
																	Magnesium sulfate'	0.327313	0.301464	165.711
																	Magnesium sulfate'	0.482741	0.431579	190.97
																	Magnesium sulfate'	0.35288	0.292748	166.518
																	Magnesium sulfate'	0.368118	0.312653	175.223
																	Magnesium sulfate'	0.361352	0.327832	189.404
																	Magnesium sulfate'	0.366097	0.301636	158.391
																	Magnesium sulfate'	0.30886	0.287427	172.042
																	Magnesium sulfate'	0.299849	0.278945	166.534
																	Magnesium sulfate'	0.38367	0.362875	179.871
																	Magnesium sulfate'	0.297549	0.268298	162.904
																	Magnesium sulfate'	0.438691	0.38477	186.354
																	Magnesium sulfate'	0.346247	0.296641	162.497
																	Magnesium sulfate'	0.39509	0.345725	143.467
																	Magnesium sulfate'	0.420756	0.383873	162.076
																	Magnesium sulfate'	0.298953	0.245211	125.181
																	Magnesium sulfate'	0.362812	0.33676	143.417
																	Magnesium sulfate'	0.360265	0.334119	139.166
																	Magnesium sulfate'	0.46304	0.441943	146.232
																	Magnesium sulfate'	0.36683	0.333734	136.229
																	Magnesium sulfate'	0.555577	0.503959	152.171
																	Magnesium sulfate'	0.269349	0.225675	130.342
																	Magnesium sulfate'	0.507261	0.454344	153.142
																	Magnesium sulfate'	0.420939	0.382224	164.813
																	Magnesium sulfate'	0.671793	0.624671	136.207
																	Magnesium sulfate'	0.38031	0.355201	144.135
																	Magnesium sulfate'	0.346075	0.324356	137.773
																	Magnesium sulfate'	0.388218	0.355711	156.306
																	Magnesium sulfate'	0.345508	0.309856	140.961
																	Magnesium sulfate'	0.368111	0.299166	163.76
																	Magnesium sulfate'	0.659401	0.627956	140.692
																	Magnesium sulfate'	0.392965	0.361331	146.07
																	Magnesium sulfate'	0.454002	0.425051	165.61
																	Magnesium sulfate'	0.274724	0.235057	126.081
																	Magnesium sulfate'	0.401427	0.377624	145.236
																	Magnesium sulfate'	0.402033	0.376561	141.965
																	Magnesium sulfate'	0.516124	0.499781	151.082
																	Magnesium sulfate'	0.405176	0.379873	140.784
																	Magnesium sulfate'	0.598341	0.563789	157.502
																	Magnesium sulfate'	0.256037	0.219215	134.475
																	Magnesium sulfate'	0.336809	0.280999	141.591
																	Magnesium sulfate'	0.381069	0.333448	157.792
																	Magnesium sulfate'	0.224427	0.170295	121.943
																	Magnesium sulfate'	0.323536	0.291036	137.006
																	Magnesium sulfate'	0.322455	0.290928	134.034
																	Magnesium sulfate'	0.435263	0.404134	144.332
																	Magnesium sulfate'	0.341927	0.298238	135.326
																	Magnesium sulfate'	0.539316	0.472882	154.473
																	Magnesium sulfate'	0.19762	0.153602	127.818
																	Sodium chloride'	0.5432	0.492271	45.1612
																	Sodium chloride'	0.444772	0.384718	60.4019
																	Sodium chloride'	0.816697	0.788776	34.9101
																	Sodium chloride'	0.432498	0.384579	42.0172
																	Sodium chloride'	0.388954	0.344048	37.7905
																	Sodium chloride'	0.411942	0.342121	47.3682
																	Sodium chloride'	0.40991	0.349556	44.9378
																	Sodium chloride'	0.341877	0.244763	51.8808
																	Sodium chloride'	0.819356	0.806888	33.928
																	Sodium chloride'	0.0684984	0.0423131	23.4086
																	Sodium chloride'	0.0794122	0.0516301	40.5437
																	Sodium chloride'	0.101335	0.0702826	19.2055
																	Sodium chloride'	0.0591103	0.0375689	27.0129
																	Sodium chloride'	0.0632403	0.0431744	21.5542
																	Sodium chloride'	0.117697	0.0963791	26.9872
																	Sodium chloride'	0.0756212	0.0518068	25.6067
																	Sodium chloride'	0.192113	0.153238	30.467
																	Sodium chloride'	0.100116	0.0736813	18.4437
																	Sodium chloride'	0.0312934	0.00712019	19.8144
																	Sodium chloride'	0.105665	0.0525337	43.5372
																	Sodium chloride'	0.0701652	0.0551867	11.2282
																	Sodium chloride'	0.0935931	0.0488161	28.3524
																	Sodium chloride'	0.0963046	0.0523822	26.4999
																	Sodium chloride'	0.169892	0.11937	29.2481
																	Sodium chloride'	0.122644	0.0708028	31.4945
																	Sodium chloride'	0.213934	0.150583	33.6873
																	Sodium chloride'	0.0974194	0.0776488	12.9253

## Sheet: Mean Distances
Acetate Study	Reference = '0'				12 PCs (99.2758%)
Factor	TSD (mean)	TSD (stdev)	TPD (mean)	TPD (stdev)	TCD (mean)	TCD (stdev)
0'	0.118264	0.124246	0.097007	0.11378	13.5522	7.99301
15'	0.156489	0.163264	0.123285	0.148733	64.5892	19.125
30'	0.419156	0.211446	0.353761	0.234243	98.8776	24.0961
7.5'	0.145724	0.130546	0.1181	0.127131	47.4683	21.6765
Sodium Chloride Study	Reference = '0'				12 PCs (99.5533%)
Factor	TSD (mean)	TSD (stdev)	TPD (mean)	TPD (stdev)	TCD (mean)	TCD (stdev)
0'	0.118296	0.124256	0.09552	0.114666	15.824	8.21365
50'	0.286785	0.235425	0.242546	0.247055	86.1036	25.1568
100'	0.208839	0.190919	0.164534	0.192105	88.1375	24.3695
150'	0.368995	0.25613	0.330978	0.265161	78.9304	21.7028
Magnesium sulfate Study	Reference = '7.5'				12 PCs (99.1432%)
Factor	TSD (mean)	TSD (stdev)	TPD (mean)	TPD (stdev)	TCD (mean)	TCD (stdev)
62.5'	0.118296	0.124256	0.0982264	0.122295	20.2527	11.9843
0'	0.484425	0.217849	0.461813	0.219219	638.311	89.2195
15.625 '	0.370172	0.121831	0.338817	0.130216	686.876	93.0128
31.25'	0.424899	0.134362	0.405458	0.129335	643.52	88.5408
All Phenotypes Study	Reference = '0'				15 PCs (99.2527%)
Factor	TSD (mean)	TSD (stdev)	TPD (mean)	TPD (stdev)	TCD (mean)	TCD (stdev)
Acetate'	0.240457	0.212785	0.157268	0.172537	34.4209	15.2819
BG-11'	0.118264	0.124246	0.0909077	0.108863	11.167	7.36258
Magnesium sulfate'	0.426132	0.169889	0.364793	0.15766	162.7	22.2394
Sodium chloride'	0.287995	0.237425	0.216918	0.221911	48.475	20.979

## Sheet: ANOVA
Acetate Study
Based on TPD data							Based on TCD data (12 PCs)
Source'	SS'	df'	MS'	F'	Prob>F'		Source'	SS'	df'	MS'	F'	Prob>F'
Groups'	3.55873	3	1.18624	44.7219	3.66117e-24		Groups'	306732	3	102244	276.308	1.83053e-88
Error'	8.48797	320	0.0265249	[]	[]		Error'	118412	320	370.036	[]	[]
Total'	12.0467	323	[]	[]	[]		Total'	425143	323	[]	[]	[]
Sodium Chloride Study
Based on TPD data							Based on TCD data (12 PCs)
Source'	SS'	df'	MS'	F'	Prob>F'		Source'	SS'	df'	MS'	F'	Prob>F'
Groups'	2.49944	3	0.833148	18.3716	5.06329e-11		Groups'	289397	3	96465.8	218.593	3.96015e-77
Error'	14.5119	320	0.0453497	[]	[]		Error'	141217	320	441.304	[]	[]
Total'	17.0114	323	[]	[]	[]		Total'	430615	323	[]	[]	[]
Magnesium sulfate Study
Based on TPD data							Based on TCD data (12 PCs)
Source'	SS'	df'	MS'	F'	Prob>F'		Source'	SS'	df'	MS'	F'	Prob>F'
Groups'	6.22111	3	2.0737	85.7815	9.46505e-41		Groups'	2.4687e+07	3	8.22899e+06	1338.34	1.10743e-180
Error'	7.73575	320	0.0241742	[]	[]		Error'	1.96757e+06	320	6148.65	[]	[]
Total'	13.9569	323	[]	[]	[]		Total'	2.66545e+07	323	[]	[]	[]
All Phenotypes Study
Based on TPD data							Based on TCD data (15 PCs)
Source'	SS'	df'	MS'	F'	Prob>F'		Source'	SS'	df'	MS'	F'	Prob>F'
Groups'	7.30871	3	2.43624	75.2783	6.24614e-43		Groups'	2.77012e+06	3	923374	2592.7	0
Error'	26.0846	806	0.032363	[]	[]		Error'	287052	806	356.144	[]	[]
Total'	33.3933	809	[]	[]	[]		Total'	3.05717e+06	809	[]	[]	[]

## Sheet: Pair-wise Comparisons
Acetate Study
Based on TPD data							Based on TCD data (12 PCs)
Group 1	Group 2	Lower Level 95% Confidence	Difference in Group Means	Upper Level 95% confidence	p value		Group 1	Group 2	Lower Level 95% Confidence	Difference in Group Means	Upper Level 95% confidence	p value
15'	7.5'	-0.0605609	0.00518499	0.0709309	0.997058		15'	7.5'	9.35553	17.1209	24.8863	9.19041e-08
15'	0'	-0.0394678	0.0262781	0.092024	0.733705		15'	0'	43.2716	51.037	58.8024	3.76826e-09
15'	30'	-0.296222	-0.230476	-0.16473	3.76826e-09		15'	30'	-42.0538	-34.2884	-26.523	3.76826e-09
7.5'	0'	-0.0446528	0.0210931	0.086839	0.843029		7.5'	0'	26.1507	33.9161	41.6815	3.76826e-09
7.5'	30'	-0.301407	-0.235661	-0.169915	3.76826e-09		7.5'	30'	-59.1747	-51.4093	-43.6439	3.76826e-09
0'	30'	-0.3225	-0.256754	-0.191008	3.76826e-09		0'	30'	-93.0908	-85.3254	-77.56	3.76826e-09
Sodium Chloride Study
Based on TPD data							Based on TCD data (12 PCs)
Group 1	Group 2	Lower Level 95% Confidence	Difference in Group Means	Upper Level 95% confidence	p value		Group 1	Group 2	Lower Level 95% Confidence	Difference in Group Means	Upper Level 95% confidence	p value
0'	100'	-0.154981	-0.0690142	0.0169524	0.165547		0'	100'	-80.7937	-72.3134	-63.8331	3.76826e-09
0'	150'	-0.321424	-0.235458	-0.149491	3.77891e-09		0'	150'	-71.5867	-63.1064	-54.6261	3.76826e-09
0'	50'	-0.232992	-0.147026	-0.0610592	6.57743e-05		0'	50'	-78.7599	-70.2796	-61.7993	3.76826e-09
100'	150'	-0.25241	-0.166444	-0.080477	3.91331e-06		100'	150'	0.726764	9.20706	17.6873	0.0271214
100'	50'	-0.163978	-0.0780115	0.007955	0.0910024		100'	50'	-6.44646	2.03383	10.5141	0.92698
150'	50'	0.00246547	0.088432	0.174399	0.0409917		150'	50'	-15.6535	-7.17323	1.30706	0.130753
Magnesium sulfate Study
Based on TPD data							Based on TCD data (12 PCs)
Group 1	Group 2	Lower Level 95% Confidence	Difference in Group Means	Upper Level 95% confidence	p value		Group 1	Group 2	Lower Level 95% Confidence	Difference in Group Means	Upper Level 95% confidence	p value
62.5'	0'	-0.426352	-0.363587	-0.300822	3.76826e-09		62.5'	0'	-649.712	-618.058	-586.404	3.76826e-09
62.5'	15.625'	-0.303355	-0.24059	-0.177825	3.76826e-09		62.5'	15.625'	-698.278	-666.624	-634.969	3.76826e-09
62.5'	31.25'	-0.369996	-0.307231	-0.244466	3.76826e-09		62.5'	31.25'	-654.921	-623.267	-591.613	3.76826e-09
0'	15.625'	0.0602314	0.122996	0.185762	2.8635e-06		0'	15.625'	-80.2199	-48.5657	-16.9115	0.000469912
0'	31.25'	-0.00640977	0.0563553	0.11912	0.0964683		0'	31.25'	-36.8636	-5.2094	26.4448	0.974603
15.625'	31.25'	-0.129406	-0.0666411	-0.00387603	0.0323526		15.625'	31.25'	11.7021	43.3563	75.0105	0.00244751
All Phenotypes Study
Based on TPD data							Based on TCD data (15 PCs)
Group 1	Group 2	Lower Level 95% Confidence	Difference in Group Means	Upper Level 95% confidence	p value		Group 1	Group 2	Lower Level 95% Confidence	Difference in Group Means	Upper Level 95% confidence	p value
Acetate'	BG-11'	0.00706542	0.0663608	0.125656	0.0210497		Acetate'	BG-11'	17.0336	23.2539	29.4742	3.76826e-09
Acetate'	Sodium chloride'	-0.101578	-0.0596496	-0.0177214	0.00146809		Acetate'	Sodium chloride'	-18.4525	-14.0541	-9.6557	3.76826e-09
Acetate'	Magnesium sulfate'	-0.249453	-0.207524	-0.165596	3.76826e-09		Acetate'	Magnesium sulfate'	-132.678	-128.279	-123.881	3.76826e-09
BG-11'	Sodium chloride'	-0.185306	-0.12601	-0.066715	2.88849e-07		BG-11'	Sodium chloride'	-43.5283	-37.308	-31.0877	3.76826e-09
BG-11'	Magnesium sulfate'	-0.333181	-0.273885	-0.21459	3.76826e-09		BG-11'	Magnesium sulfate'	-157.754	-151.533	-145.313	3.76826e-09
Sodium chloride'	Magnesium sulfate'	-0.189803	-0.147875	-0.105947	3.76826e-09		Sodium chloride'	Magnesium sulfate'	-118.624	-114.225	-109.827	3.76826e-09

## Sheet: Regression
Acetate Study
Factors	TSDmean	TSDstd	TPDmean	TPDstd	TCDmean	TCDstd				TSDfit	TPDfit	TCDfit
0	0.118264	0.124246	0.097007	0.11378	13.5522	7.99301			Slope	0.0101481	0.00866203	2.73226
7.5	0.145724	0.130546	0.1181	0.127131	47.4683	21.6765			Intercept	0.076715	0.0593491	20.261
15	0.156489	0.163264	0.123285	0.148733	64.5892	19.125			R-square	0.856833	0.840543	0.970287
30	0.419156	0.211446	0.353761	0.234243	98.8776	24.0961
Sodium chloride Study
Factors	TSDmean	TSDstd	TPDmean	TPDstd	TCDmean	TCDstd				TSDfit	TPDfit	TCDfit
0	0.118296	0.124256	0.09552	0.114666	15.824	8.21365			Slope	0.0013483	0.00125672	0.382706
50	0.286785	0.235425	0.242546	0.247055	86.1036	25.1568			Intercept	0.144606	0.11414	38.5459
100	0.208839	0.190919	0.164534	0.192105	88.1375	24.3695			R-square	0.659048	0.63978	0.512425
150	0.368995	0.25613	0.330978	0.265161	78.9304	21.7028
Magnesium sulfate Study
Factors	TSDmean	TSDstd	TPDmean	TPDstd	TCDmean	TCDstd				TSDfit	TPDfit	TCDfit
0	0.484425	0.217849	0.461813	0.219219	638.311	89.2195			Slope	-0.0458961	-0.0450994	-86.903
15.625	0.370172	0.121831	0.338817	0.130216	686.876	93.0128			Intercept	0.500044	0.474061	782.39
31.25	0.424899	0.134362	0.405458	0.129335	643.52	88.5408			R-square	0.833175	0.814646	0.762249
62.5	0.118296	0.124256	0.0982264	0.122295	20.2527	11.9843

## Sheet: PRO Results
Study	Factor	Number of PCs	% Variability Explained by PCs	Accuracy	Sensitivity	Specificity	Scans Used
Acetate	0 mM	6	92.3537	0.777778	0.444444	0.888889	SYN1-SYN27, SYN53-SYN61
Acetate	0 mM	10	98.7642	0.777778	0.333333	0.925926	SYN1-SYN27, SYN53-SYN61
Acetate	0 mM	12	99.2758	0.916667	1	0.888889	SYN1-SYN27, SYN53-SYN61
Acetate	0 mM	15	99.5727	0.833333	1	0.777778	SYN1-SYN27, SYN53-SYN61
Acetate	0 mM	20	99.7728	0.666667	1	0.555556	SYN1-SYN27, SYN53-SYN61
Acetate	0 mM	25	99.8883	0.305556	1	0.0740741	SYN1-SYN27, SYN53-SYN61
Acetate	0 mM	30	99.9604	0.75	0.777778	0.740741	SYN1-SYN27, SYN53-SYN61
Acetate	0 mM	33	99.9889	0.666667	0.111111	0.851852	SYN1-SYN27, SYN53-SYN61
Acetate	7.5 mM	6	92.3537	0.694444	0.222222	0.851852	SYN1-SYN27, SYN53-SYN61
Acetate	7.5 mM	10	98.7642	0.777778	0.555556	0.851852	SYN1-SYN27, SYN53-SYN61
Acetate	7.5 mM	12	99.2758	0.777778	0.666667	0.814815	SYN1-SYN27, SYN53-SYN61
Acetate	7.5 mM	15	99.5727	0.805556	0.777778	0.814815	SYN1-SYN27, SYN53-SYN61
Acetate	7.5 mM	20	99.7728	0.416667	1	0.222222	SYN1-SYN27, SYN53-SYN61
Acetate	7.5 mM	25	99.8883	0.277778	1	0.037037	SYN1-SYN27, SYN53-SYN61
Acetate	7.5 mM	30	99.9604	0.305556	1	0.0740741	SYN1-SYN27, SYN53-SYN61
Acetate	7.5 mM	33	99.9889	0.638889	0.333333	0.740741	SYN1-SYN27, SYN53-SYN61
Acetate	7.5 mM	4	82.5808	0.916667	0.666667	1	SYN1-SYN27, SYN53-SYN61
Acetate	15 mM	6	92.3537	0.833333	0.333333	1	SYN1-SYN27, SYN53-SYN61
Acetate	15 mM	10	98.7642	0.888889	0.555556	1	SYN1-SYN27, SYN53-SYN61
Acetate	15 mM	12	99.2758	0.888889	0.555556	1	SYN1-SYN27, SYN53-SYN61
Acetate	15 mM	15	99.5727	0.861111	0.555556	0.962963	SYN1-SYN27, SYN53-SYN61
Acetate	15 mM	20	99.7728	0.694444	0.888889	0.62963	SYN1-SYN27, SYN53-SYN61
Acetate	15 mM	25	99.8883	0.277778	1	0.037037	SYN1-SYN27, SYN53-SYN61
Acetate	15 mM	30	99.9604	0.305556	1	0.0740741	SYN1-SYN27, SYN53-SYN61
Acetate	15 mM	33	99.9889	0.722222	0	0.962963	SYN1-SYN27, SYN53-SYN61
Acetate	30 mM	6	92.3537	0.833333	0.555556	0.925926	SYN1-SYN27, SYN53-SYN61
Acetate	30 mM	10	98.7642	0.861111	0.666667	0.925926	SYN1-SYN27, SYN53-SYN61
Acetate	30 mM	12	99.2758	0.861111	0.555556	0.962963	SYN1-SYN27, SYN53-SYN61
Acetate	30 mM	15	99.5727	0.861111	0.555556	0.962963	SYN1-SYN27, SYN53-SYN61
Acetate	30 mM	20	99.7728	0.916667	1	0.888889	SYN1-SYN27, SYN53-SYN61
Acetate	30 mM	25	99.8883	0.555556	1	0.407407	SYN1-SYN27, SYN53-SYN61
Acetate	30 mM	30	99.9604	0.611111	1	0.481481	SYN1-SYN27, SYN53-SYN61
Acetate	30 mM	33	99.9889	0.333333	0.888889	0.148148	SYN1-SYN27, SYN53-SYN61
Sodium chloride	0 mM	6	95.9963	0.888889	0.555556	1	SYN19-SYN52, SYN89-SYN91
Sodium chloride	0 mM	8	98.453	0.972222	0.888889	1	SYN19-SYN52, SYN89-SYN91
Sodium chloride	0 mM	10	99.3168	1	1	1	SYN19-SYN52, SYN89-SYN91
Sodium chloride	0 mM	12	99.5533	1	1	1	SYN19-SYN52, SYN89-SYN91
Sodium chloride	0 mM	15	99.7577	0.972222	1	0.962963	SYN19-SYN52, SYN89-SYN91
Sodium chloride	0 mM	20	99.881	0.527778	1	0.37037	SYN19-SYN52, SYN89-SYN91
Sodium chloride	50 mM	6	95.9963	0.666667	0.333333	0.777778	SYN19-SYN52, SYN89-SYN91
Sodium chloride	50 mM	8	98.453	0.777778	0.111111	1	SYN19-SYN52, SYN89-SYN91
Sodium chloride	50 mM	10	99.3168	0.694444	0	0.925926	SYN19-SYN52, SYN89-SYN91
Sodium chloride	50 mM	12	99.5533	0.805556	0.333333	0.962963	SYN19-SYN52, SYN89-SYN91
Sodium chloride	50 mM	15	99.7577	0.638889	0.333333	0.740741	SYN19-SYN52, SYN89-SYN91
Sodium chloride	50 mM	20	99.881	0.416667	1	0.222222	SYN19-SYN52, SYN89-SYN91
Sodium chloride	100 mM	6	95.9963	0.75	0.444444	0.851852	SYN19-SYN52, SYN89-SYN91
Sodium chloride	100 mM	8	98.453	0.833333	0.333333	1	SYN19-SYN52, SYN89-SYN91
Sodium chloride	100 mM	10	99.3168	0.916667	0.666667	1	SYN19-SYN52, SYN89-SYN91
Sodium chloride	100 mM	12	99.5533	0.861111	0.444444	1	SYN19-SYN52, SYN89-SYN91
Sodium chloride	100 mM	15	99.7577	0.833333	0.444444	0.962963	SYN19-SYN52, SYN89-SYN91
Sodium chloride	100 mM	20	99.881	0.777778	0.666667	0.814815	SYN19-SYN52, SYN89-SYN91
Sodium chloride	150 mM	6	95.9963	0.694444	0.222222	0.851852	SYN19-SYN52, SYN89-SYN91
Sodium chloride	150 mM	8	98.453	0.805556	0.222222	1	SYN19-SYN52, SYN89-SYN91
Sodium chloride	150 mM	10	99.3168	0.722222	0.222222	0.888889	SYN19-SYN52, SYN89-SYN91
Sodium chloride	150 mM	12	99.5533	0.777778	0.444444	0.888889	SYN19-SYN52, SYN89-SYN91
Sodium chloride	150 mM	15	99.7577	0.666667	0.333333	0.777778	SYN19-SYN52, SYN89-SYN91
Sodium chloride	150 mM	20	99.881	0.416667	0.888889	0.259259	SYN19-SYN52, SYN89-SYN91
Magnesium sulfate	62.5 mM	2	75.5401	1	1	1	SYN19-SYN27, SYN62-SYN88
Magnesium sulfate	62.5 mM	4	92.0435	1	1	1	SYN19-SYN27, SYN62-SYN88
Magnesium sulfate	62.5 mM	6	97.0328	1	1	1	SYN19-SYN27, SYN62-SYN88
Magnesium sulfate	62.5 mM	8	98.2137	1	1	1	SYN19-SYN27, SYN62-SYN88
Magnesium sulfate	62.5 mM	10	98.8121	1	1	1	SYN19-SYN27, SYN62-SYN88
Magnesium sulfate	62.5 mM	12	99.1432	1	1	1	SYN19-SYN27, SYN62-SYN88
Magnesium sulfate	62.5 mM	20	99.7034	0.972222	1	0.962963	SYN19-SYN27, SYN62-SYN88
Magnesium sulfate	62.5 mM	33	99.981	0.5	0.888889	0.37037	SYN19-SYN27, SYN62-SYN88
Magnesium sulfate	0 mM	2	75.5401	0.805556	0.444444	0.925926	SYN19-SYN27, SYN62-SYN88
Magnesium sulfate	0 mM	4	92.0435	0.805556	0.444444	0.925926	SYN19-SYN27, SYN62-SYN88
Magnesium sulfate	0 mM	6	97.0328	0.777778	0.444444	0.888889	SYN19-SYN27, SYN62-SYN88
Magnesium sulfate	0 mM	8	98.2137	0.777778	0.333333	0.925926	SYN19-SYN27, SYN62-SYN88
Magnesium sulfate	0 mM	10	98.8121	0.777778	0.222222	0.962963	SYN19-SYN27, SYN62-SYN88
Magnesium sulfate	0 mM	12	99.1432	0.722222	0.555556	0.777778	SYN19-SYN27, SYN62-SYN88
Magnesium sulfate	0 mM	14	99.3787	0.777778	0.777778	0.777778	SYN19-SYN27, SYN62-SYN88
Magnesium sulfate	0 mM	16	99.5225	0.694444	0.888889	0.62963	SYN19-SYN27, SYN62-SYN88
Magnesium sulfate	0 mM	18	99.6217	0.527778	1	0.37037	SYN19-SYN27, SYN62-SYN88
Magnesium sulfate	0 mM	20	99.7034	0.472222	1	0.296296	SYN19-SYN27, SYN62-SYN88
Magnesium sulfate	0 mM	33	99.981	0.722222	0.222222	0.888889	SYN19-SYN27, SYN62-SYN88
Magnesium sulfate	15.625 mM	2	75.5401	0.611111	0.444444	0.666667	SYN19-SYN27, SYN62-SYN88
Magnesium sulfate	15.625 mM	4	92.0435	0.666667	0.666667	0.666667	SYN19-SYN27, SYN62-SYN88
Magnesium sulfate	15.625 mM	6	97.0328	0.694444	0.222222	0.851852	SYN19-SYN27, SYN62-SYN88
Magnesium sulfate	15.625 mM	8	98.2137	0.861111	0.555556	0.962963	SYN19-SYN27, SYN62-SYN88
Magnesium sulfate	15.625 mM	10	98.8121	0.861111	0.666667	0.925926	SYN19-SYN27, SYN62-SYN88
Magnesium sulfate	15.625 mM	12	99.1432	0.916667	1	0.888889	SYN19-SYN27, SYN62-SYN88
Magnesium sulfate	15.625 mM	14	99.3787	0.888889	1	0.851852	SYN19-SYN27, SYN62-SYN88
Magnesium sulfate	15.625 mM	16	99.5225	0.833333	1	0.777778	SYN19-SYN27, SYN62-SYN88
Magnesium sulfate	15.625 mM	18	99.6217	0.777778	1	0.703704	SYN19-SYN27, SYN62-SYN88
Magnesium sulfate	15.625 mM	20	99.7034	0.583333	1	0.444444	SYN19-SYN27, SYN62-SYN88
Magnesium sulfate	31.25 mM	2	75.5401	0.722222	0.666667	0.740741	SYN19-SYN27, SYN62-SYN88
Magnesium sulfate	31.25 mM	4	92.0435	0.777778	0.666667	0.814815	SYN19-SYN27, SYN62-SYN88
Magnesium sulfate	31.25 mM	6	97.0328	0.833333	0.444444	0.962963	SYN19-SYN27, SYN62-SYN88
Magnesium sulfate	31.25 mM	8	98.2137	0.805556	0.222222	1	SYN19-SYN27, SYN62-SYN88
Magnesium sulfate	31.25 mM	10	98.8121	0.888889	0.777778	0.925926	SYN19-SYN27, SYN62-SYN88
Magnesium sulfate	31.25 mM	12	99.1432	0.944444	0.888889	0.962963	SYN19-SYN27, SYN62-SYN88
Magnesium sulfate	31.25 mM	14	99.3787	0.888889	1	0.851852	SYN19-SYN27, SYN62-SYN88
Magnesium sulfate	31.25 mM	16	99.5225	0.888889	1	0.851852	SYN19-SYN27, SYN62-SYN88
Magnesium sulfate	31.25 mM	18	99.6217	0.916667	1	0.888889	SYN19-SYN27, SYN62-SYN88
Magnesium sulfate	31.25 mM	20	99.7034	0.722222	1	0.62963	SYN19-SYN27, SYN62-SYN88
All Phenotypes	BG-11	10	98.324	0.922222	0.222222	1	SYN1-SYN91
All Phenotypes	BG-11	15	99.2527	1	1	1	SYN1-SYN91
All Phenotypes	BG-11	20	99.5184	0.866667	1	0.851852	SYN1-SYN91
All Phenotypes	BG-11	30	99.7286	0.4	1	0.333333	SYN1-SYN91
All Phenotypes	BG-11	40	99.8347	0.1	1	0	SYN1-SYN91
All Phenotypes	BG-11	50	99.9036	0.1	1	0	SYN1-SYN91
All Phenotypes	Acetate	10	98.324	0.811111	0.62963	0.888889	SYN1-SYN91
All Phenotypes	Acetate	15	99.2527	0.866667	0.555556	1	SYN1-SYN91
All Phenotypes	Acetate	20	99.5184	0.844444	0.481481	1	SYN1-SYN91
All Phenotypes	Acetate	30	99.7286	0.844444	0.481481	1	SYN1-SYN91
All Phenotypes	Acetate	40	99.8347	0.888889	0.777778	0.936508	SYN1-SYN91
All Phenotypes	Acetate	50	99.9036	0.488889	1	0.269841	SYN1-SYN91
All Phenotypes	Sodium chloride	10	98.324	0.833333	0.740741	0.873016	SYN1-SYN91
All Phenotypes	Sodium chloride	15	99.2527	0.877778	0.703704	0.952381	SYN1-SYN91
All Phenotypes	Sodium chloride	20	99.5184	0.844444	0.481481	1	SYN1-SYN91
All Phenotypes	Sodium chloride	30	99.7286	0.8	0.333333	1	SYN1-SYN91
All Phenotypes	Sodium chloride	40	99.8347	0.833333	0.518519	0.968254	SYN1-SYN91
All Phenotypes	Sodium chloride	50	99.9036	0.866667	0.962963	0.825397	SYN1-SYN91
All Phenotypes	Magnesium sulfate	10	98.324	0.966667	0.888889	1	SYN1-SYN91
All Phenotypes	Magnesium sulfate	15	99.2527	0.977778	0.925926	1	SYN1-SYN91
All Phenotypes	Magnesium sulfate	20	99.5184	0.955556	0.851852	1	SYN1-SYN91
All Phenotypes	Magnesium sulfate	30	99.7286	0.977778	0.925926	1	SYN1-SYN91
All Phenotypes	Magnesium sulfate	40	99.8347	0.977778	1	0.968254	SYN1-SYN91
All Phenotypes	Magnesium sulfate	50	99.9036	0.477778	1	0.253968	SYN1-SYN91

[truncated: 2 more sheets: Random chance, References]
